# Supplementary material for: Design, synthesis, and in vitro and in silico studies of 1,3,4-thiadiazole-thiazolidinone hybrids as carbonic anhydrase inhibitors
Source: Royal Society of Chemistry journal article supplement (doi:10.1039/d3nj01547e), 2023-01-01
Supplement: d3nj01547e1.pdf [file d3nj01547e1.pdf]

## Supporting Information

### **Design, synthesis, *in vitro*, and *in silico* studies of 1,3,4-thiadiazole-thiazolidinone hybrids as carbonic anhydrase inhibitors**

Narges Hosseini Nasab,<sup>a</sup> Hussain Raza,<sup>a</sup> Young Seok Eom,<sup>a</sup> Mubashir Hassan,<sup>b</sup> Andrzej Kloczkowski,<sup>b</sup> Lloyd Christopher Chetty,<sup>c</sup> Hendrik Gert Kruger,<sup>c</sup> and Song Ja Kim<sup>\*a</sup>

<sup>a</sup> Department of Biological Sciences, Kongju National University, Gongju, Chungnam 32588, Republic of Korea

<sup>b</sup> The Steve and Cindy Rasmussen Institute for Genomic Medicine at Nationwide Children's Hospital, Department of Pediatrics, Columbus, Ohio 43205, United States of America

<sup>c</sup> Catalysis and Peptide Research Unit, School of Health Sciences, University of KwaZulu-Natal, Durban 4001, South Africa

\* Corresponding author: [ksj85@kongju.ac.kr](mailto:ksj85@kongju.ac.kr)

**Supporting Figure Captions:**

**Fig. S1:** IR Spectrum of 7a

**Fig. S2:**  $^1\text{H}$  NMR Spectrum of 7a

**Fig. S3:**  $^{13}\text{C}$  NMR Spectrum of 7a

**Fig. S4:** IR Spectrum of 7b

**Fig. S5:**  $^1\text{H}$  NMR Spectrum of 7b

**Fig. S6:**  $^{13}\text{C}$  NMR Spectrum of 7b

**Fig. S7:** IR Spectrum of 7c

**Fig. S8:**  $^1\text{H}$  NMR Spectrum of 7c

**Fig. S9:**  $^{13}\text{C}$  NMR Spectrum of 7c

**Fig. S10:** IR Spectrum of 7d

**Fig. S11:**  $^1\text{H}$  NMR Spectrum of 7d

**Fig. S12:**  $^{13}\text{C}$  NMR Spectrum of 7d

**Fig. S13:** IR Spectrum of 7e

**Fig. S14:**  $^1\text{H}$  NMR Spectrum of 7e

**Fig. S15:**  $^{13}\text{C}$  NMR Spectrum of 7e

**Fig. S16:** IR Spectrum of 7f

**Fig. S17:**  $^1\text{H}$  NMR Spectrum of 7f

**Fig. S18:**  $^{13}\text{C}$  NMR Spectrum of 7f

**Fig. S19:** IR Spectrum of 7g

**Fig. S20:**  $^1\text{H}$  NMR Spectrum of 7g

**Fig. S21:**  $^{13}\text{C}$  NMR Spectrum of 7g

**Fig. S22:** IR Spectrum of 7h

**Fig. S23:**  $^1\text{H}$  NMR Spectrum of 7h

**Fig. S24:**  $^{13}\text{C}$  NMR Spectrum of 7h

**Fig. S25:** IR Spectrum of 7i

**Fig. S26:**  $^1\text{H}$  NMR Spectrum of 7i

**Fig. S27:**  $^{13}\text{C}$  NMR Spectrum of 7i

**Fig. S28:** IR Spectrum of 7j

**Fig. S29:**  $^1\text{H}$  NMR Spectrum of 7j

**Fig. S30:**  $^{13}\text{C}$  NMR Spectrum of 7j

**Fig. S31:** COSY Spectrum of 7e

**Fig. S32:** HSQC Spectrum of 7e

**Fig. S33:** HMBC Spectrum of 7e

**Fig. S34:** Ramachandran graph of carbonic anhydrase

**Fig. S35:** 2D-docking depiction of 7a complex against carbonic anhydrase

**Fig. S36:** 2D-docking depiction of 7b complex against carbonic anhydrase

**Fig. S37:** 2D-docking depiction of 7c complex against carbonic anhydrase

**Fig. S38:** 2D-docking depiction of 7d complex against carbonic anhydrase

**Fig. S39:** 2D-docking depiction of 7e complex against carbonic anhydrase

**Fig. S40:** 2D-docking depiction of 7f complex against carbonic anhydrase

**Fig. S41:** 2D-docking depiction of 7g complex against carbonic anhydrase

**Fig. S42:** 2D-docking depiction of 7h complex against carbonic anhydrase

**Fig. S43:** 2D-docking depiction of 7j complex against carbonic anhydrase

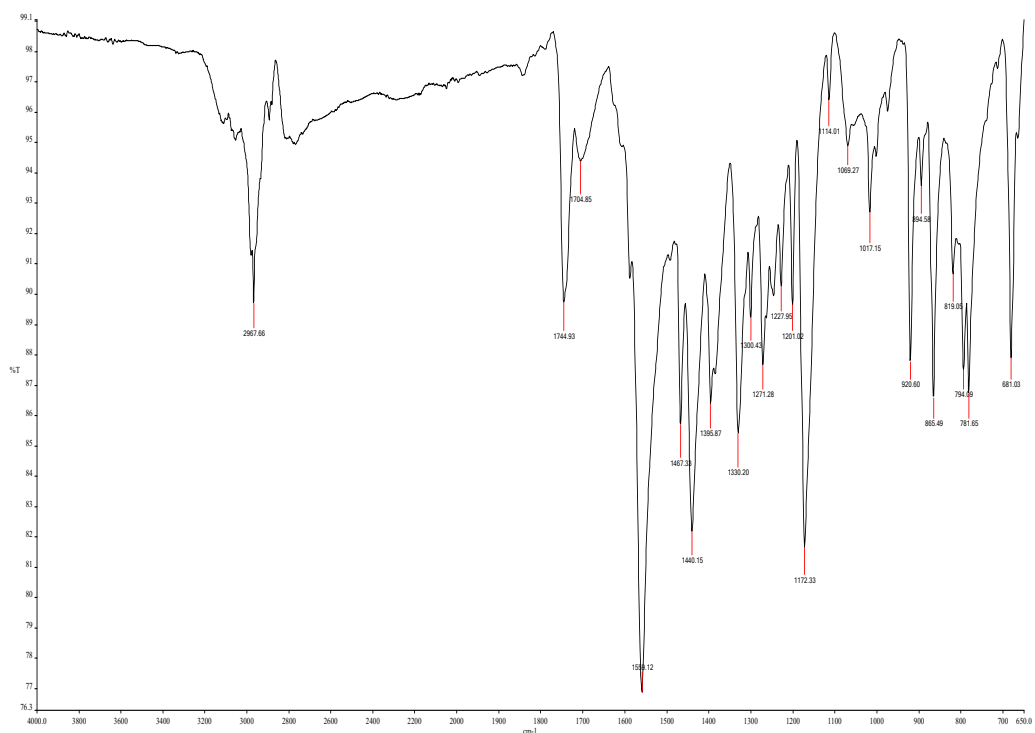

Fig. S1, ES‡

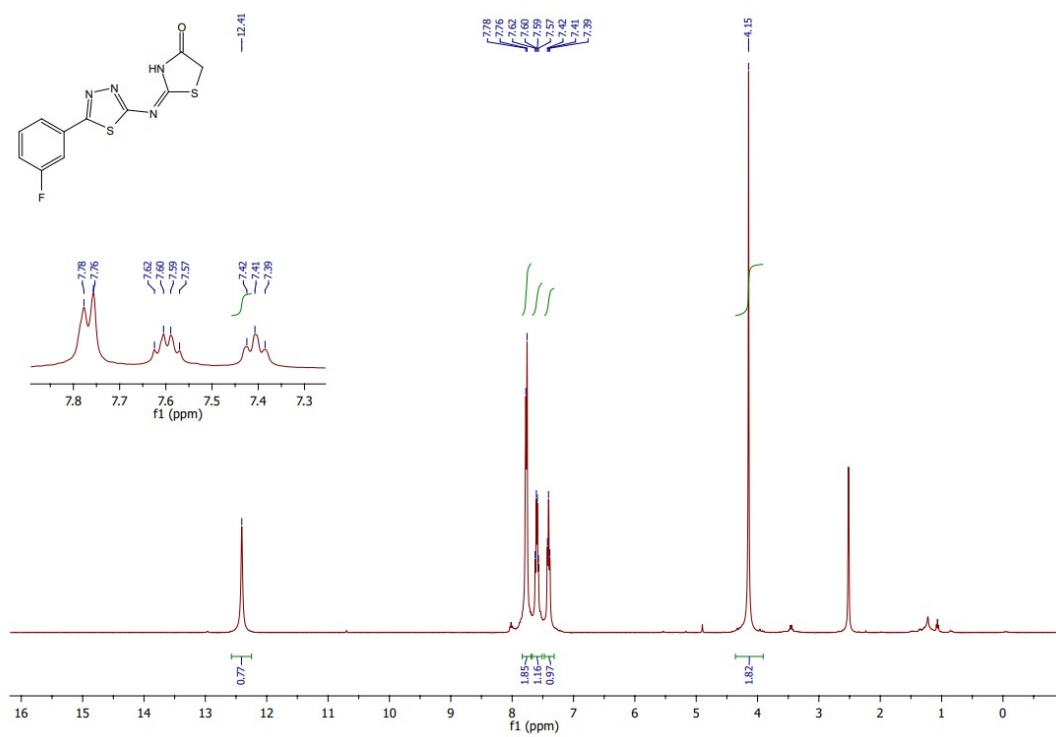

Fig. S2, ES‡

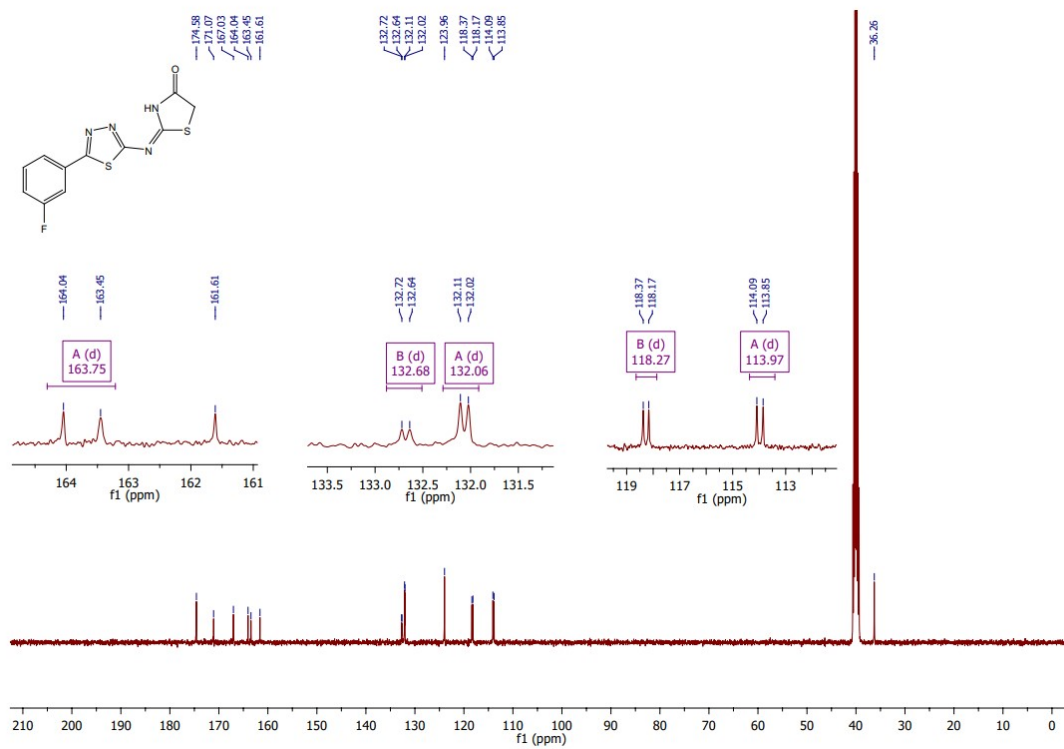

Fig. S3, ES†

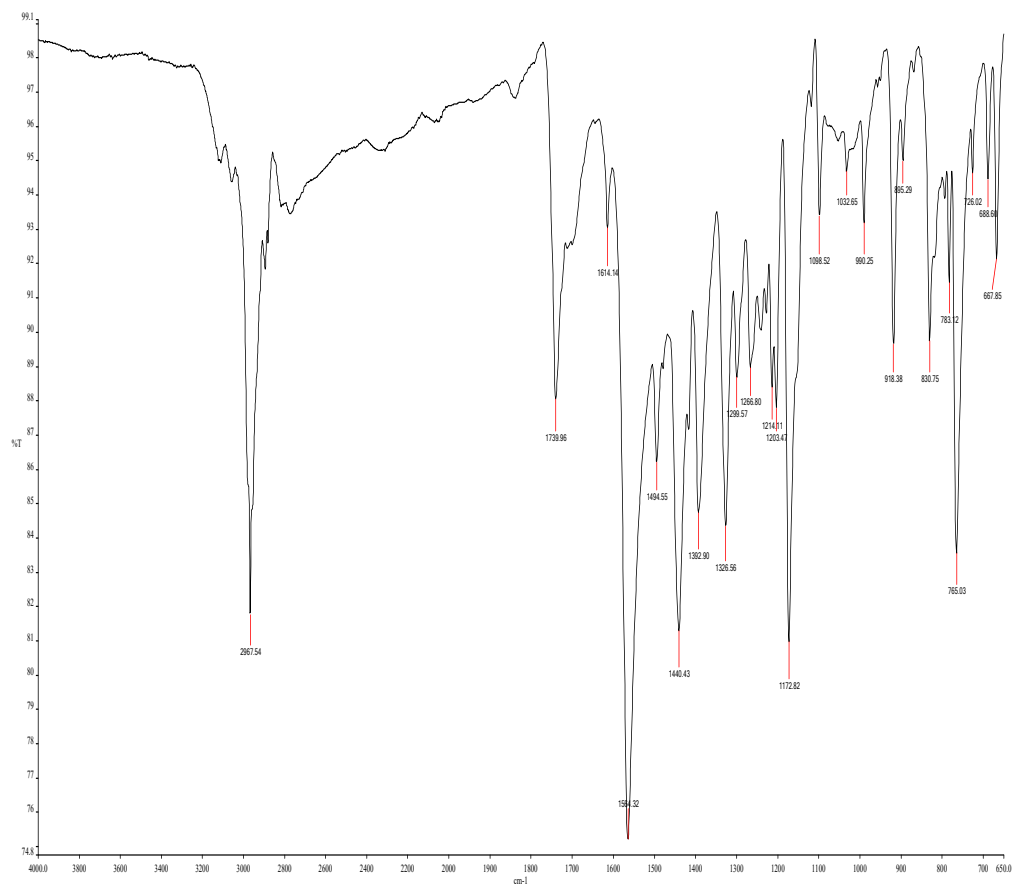

Fig. S4, ES†

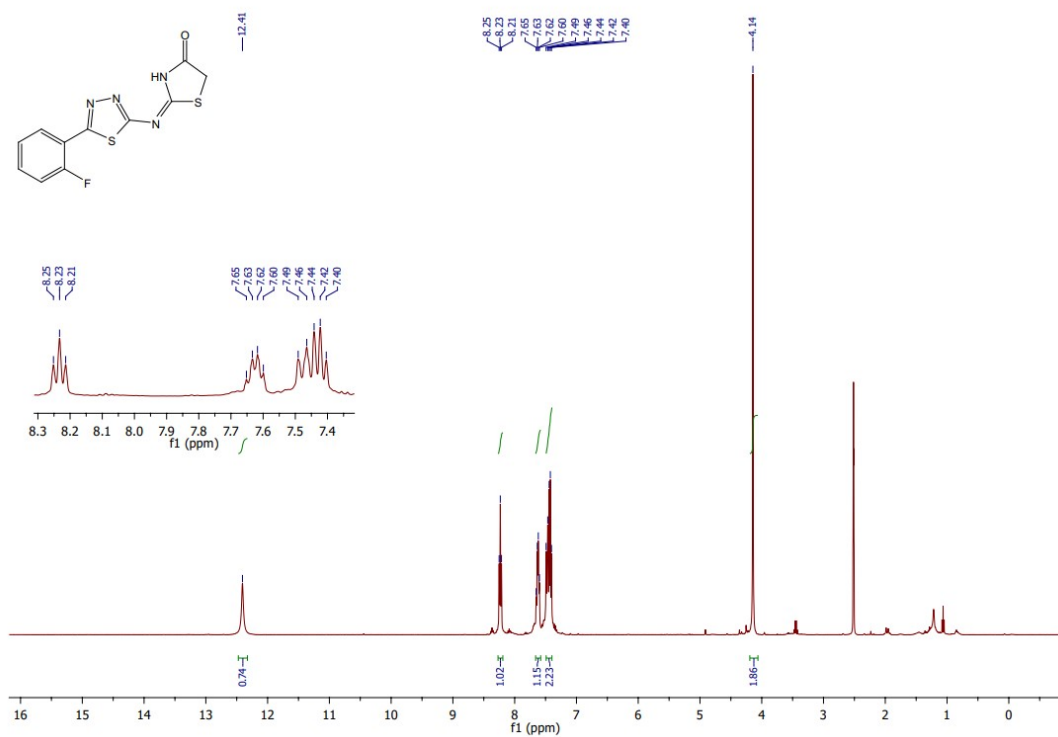

Fig. S5, ES†

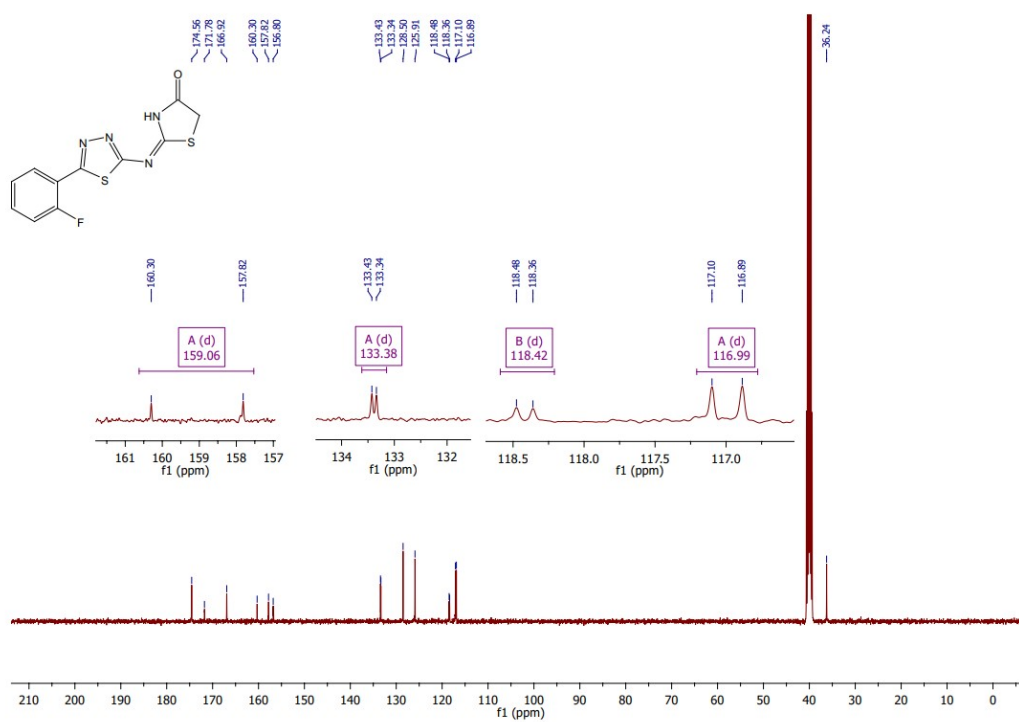

Fig. S6, ES†

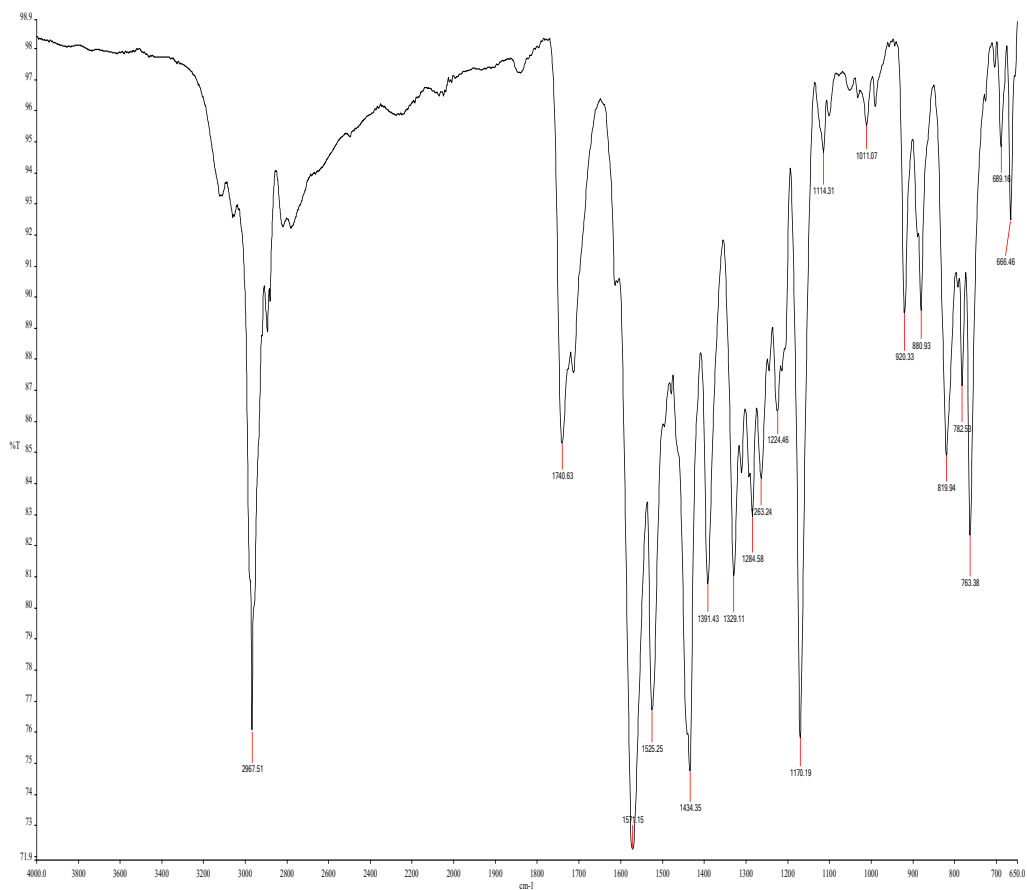

Fig. S7, ES†

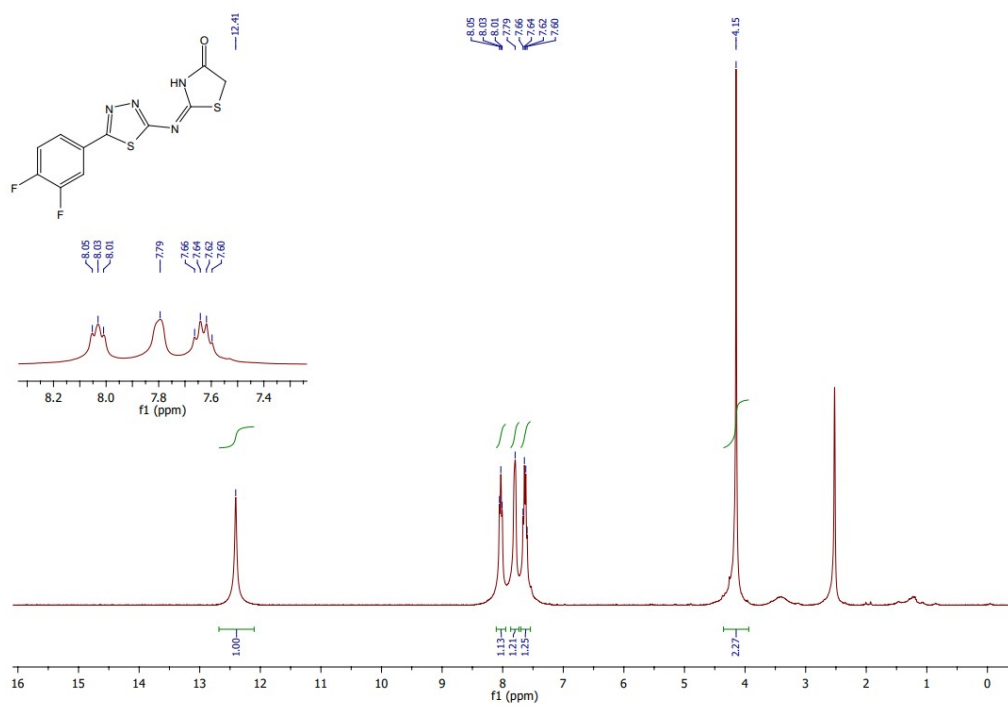



Fig. S8, ES†

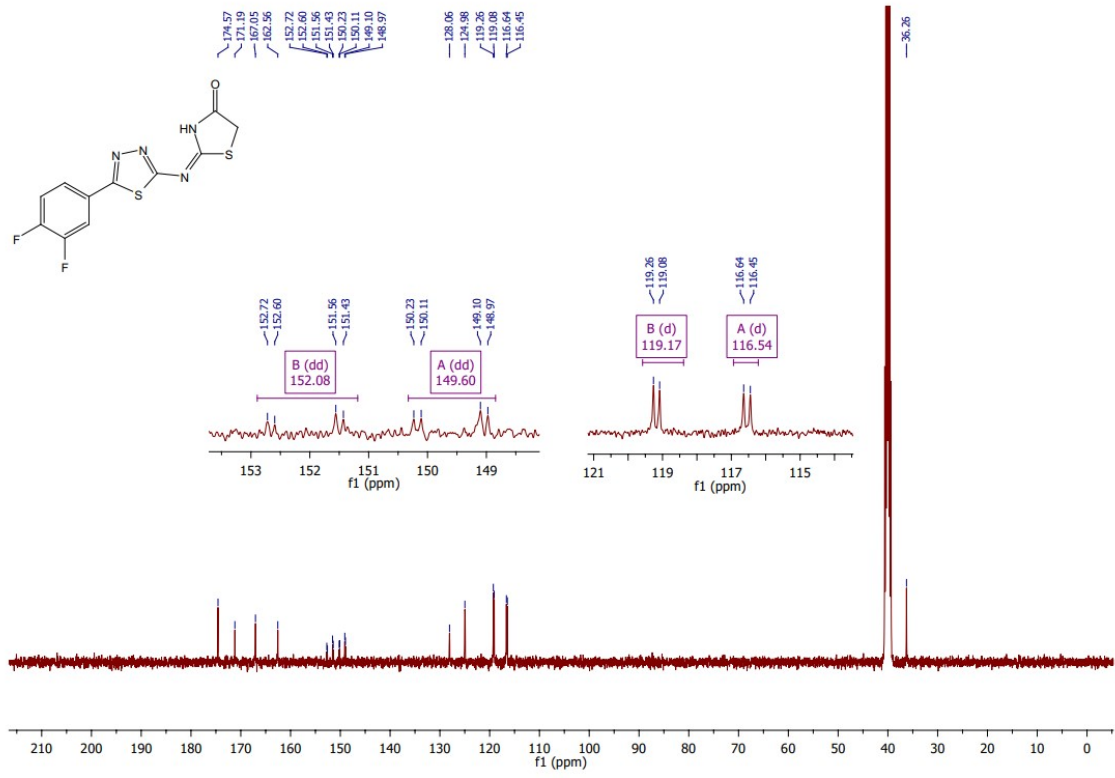

Fig. S9, ES†

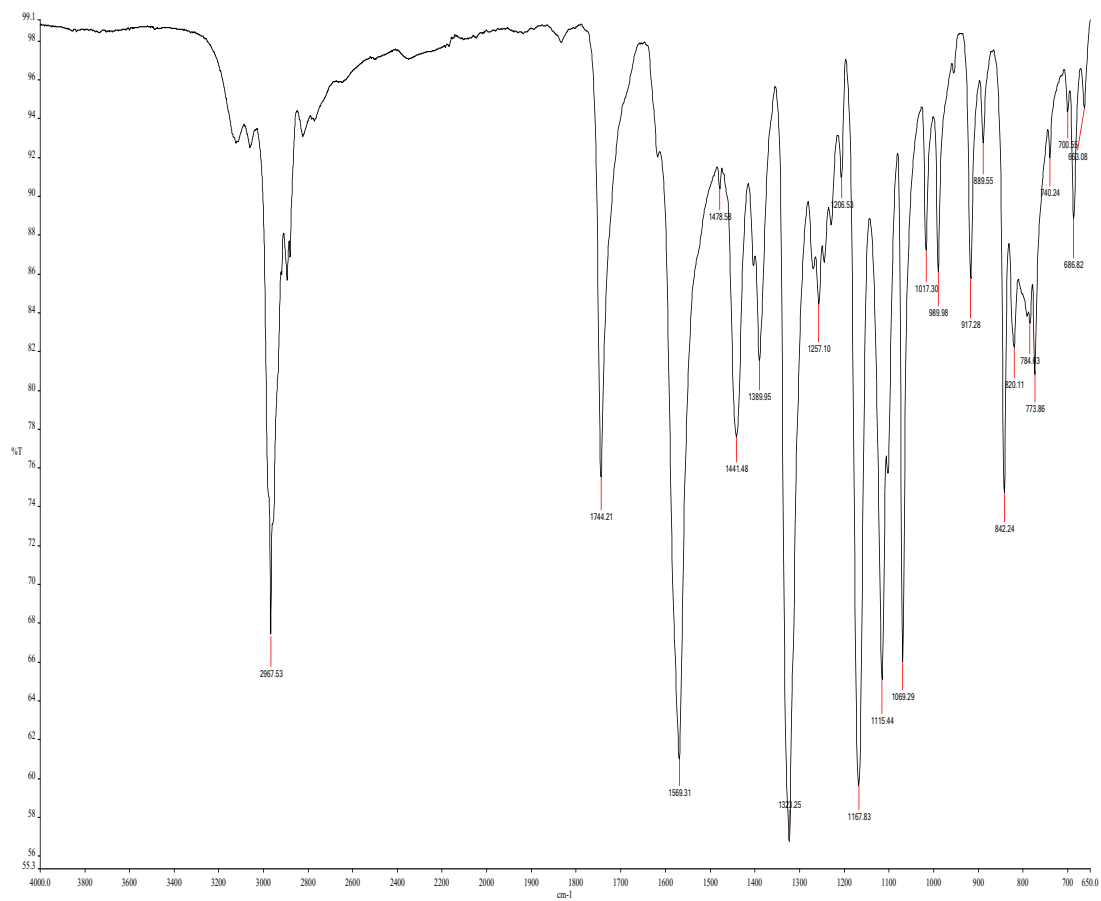

Fig. S10, ES†

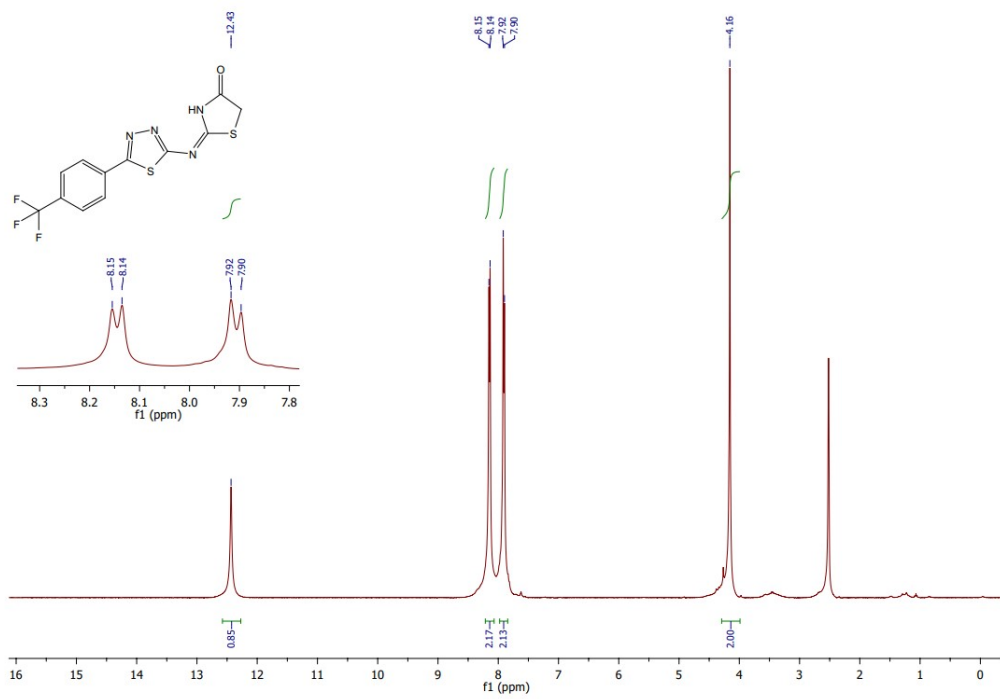

Fig. S11, ES†

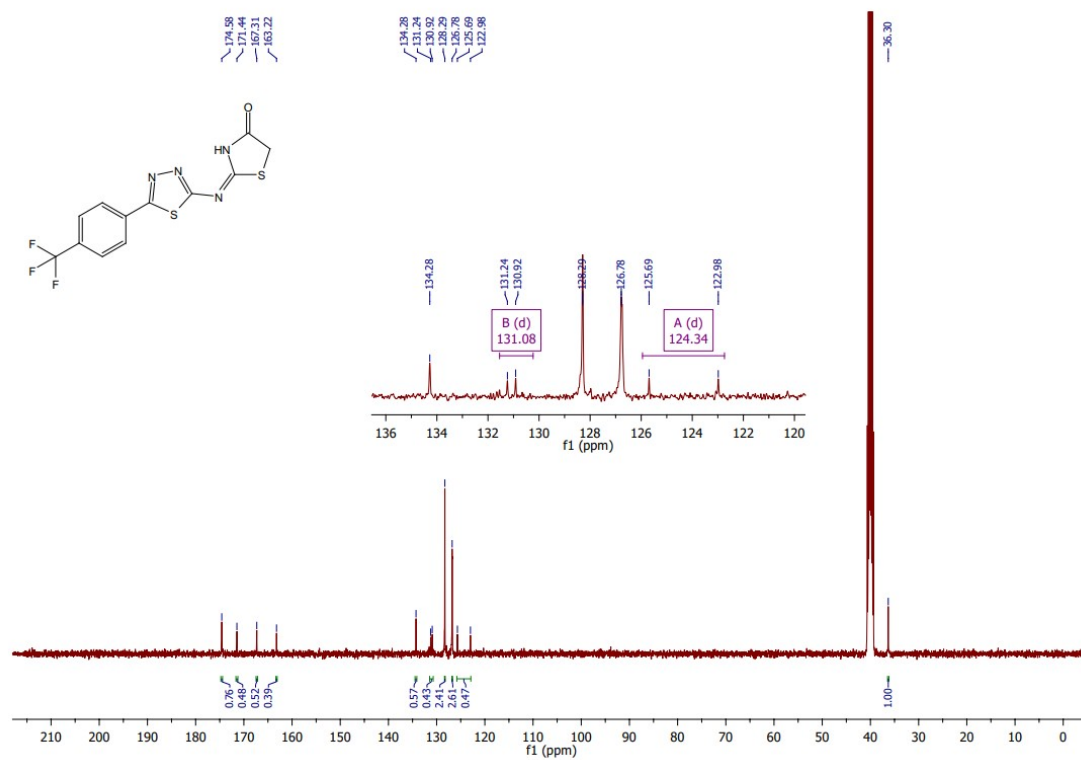

Fig. S12, ES†

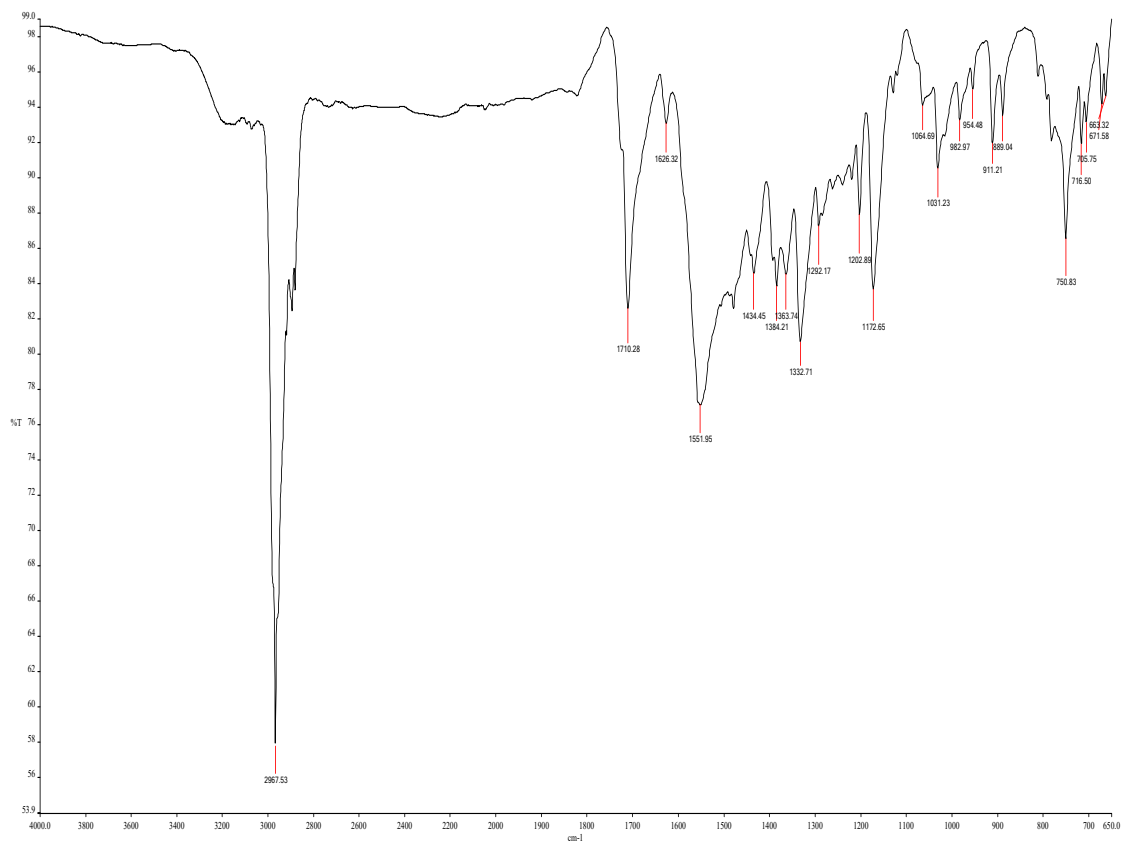

Fig. S13, ES†

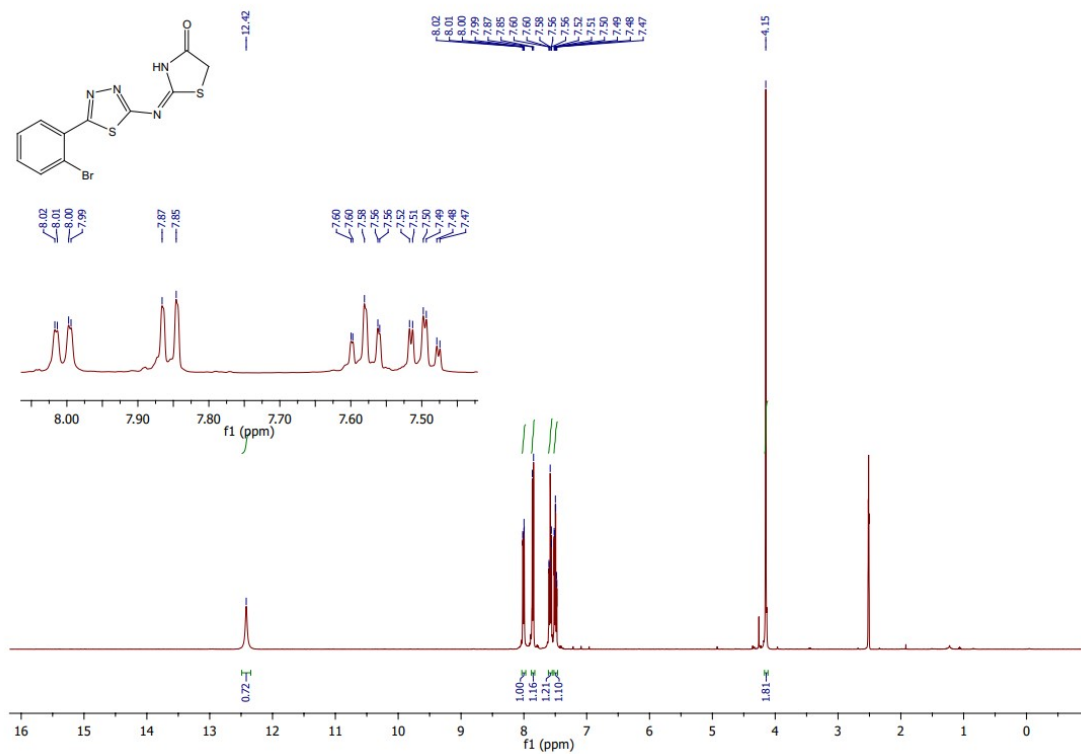

Fig. S14, ES†

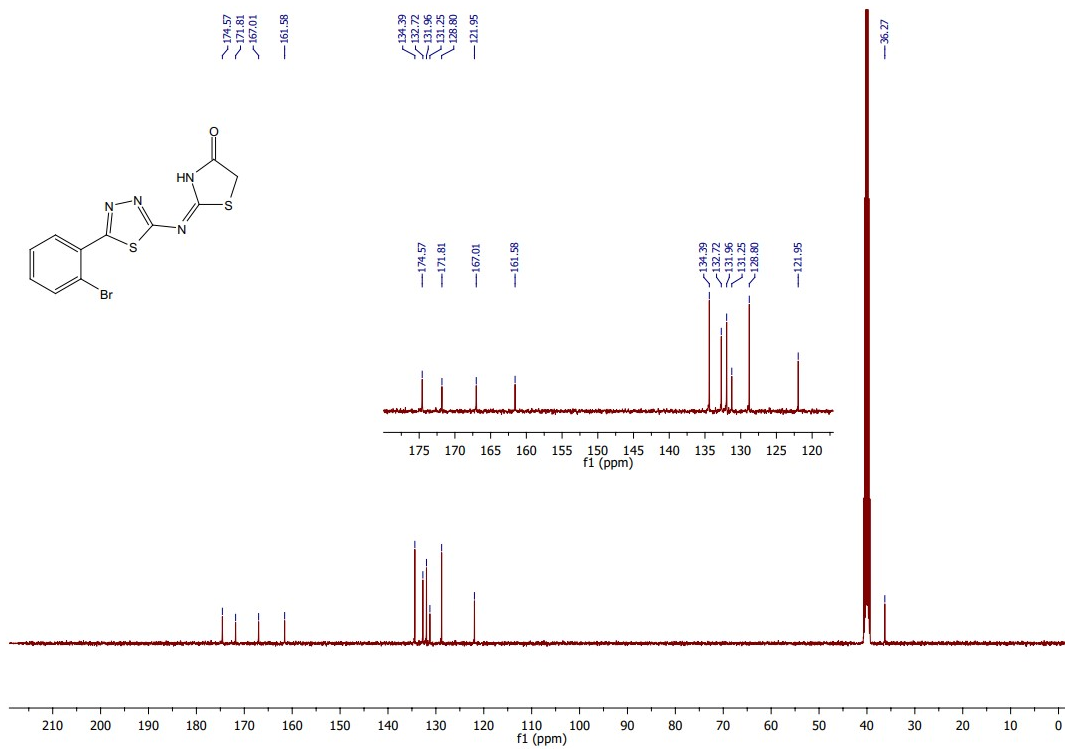

Fig. S15, ES†

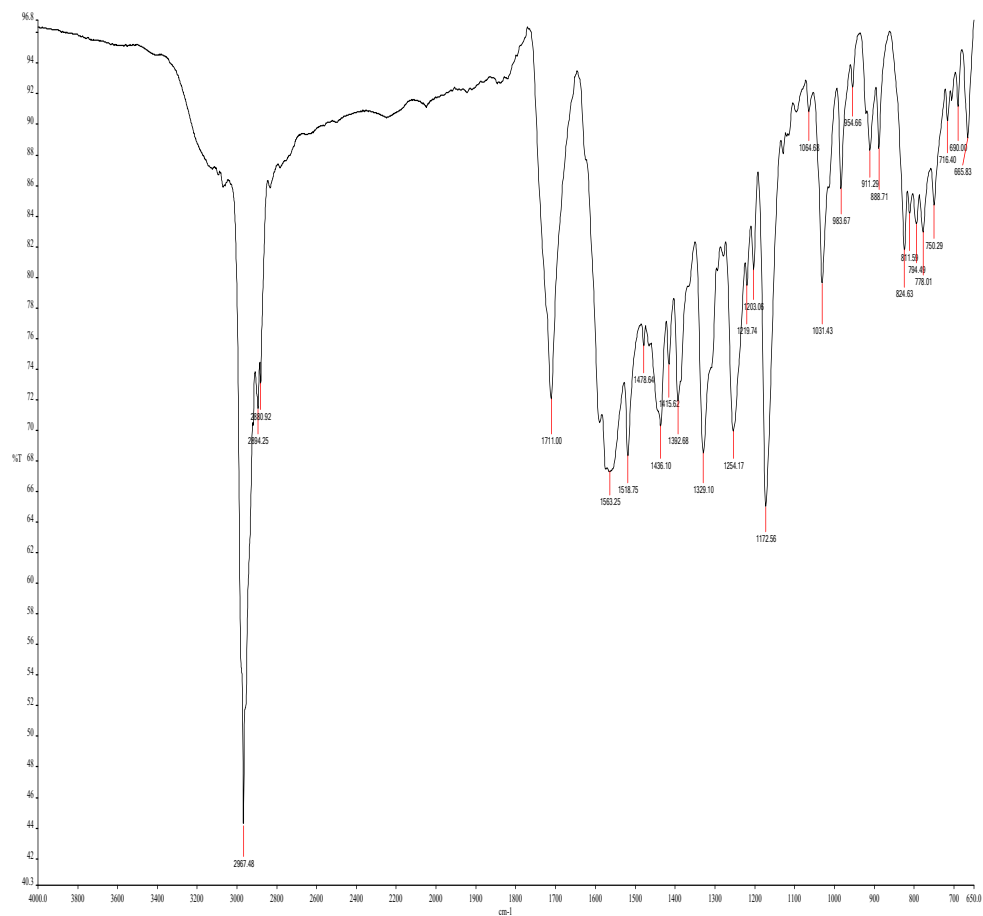

Fig. S16, ES<sup>+</sup>

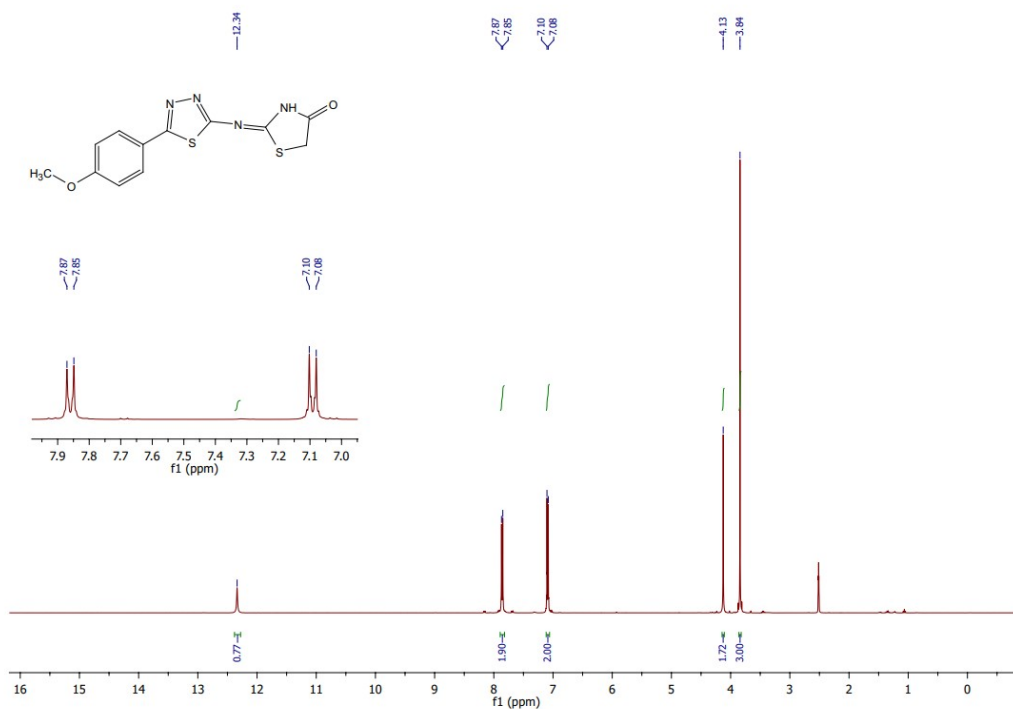

Fig. S17, ES†

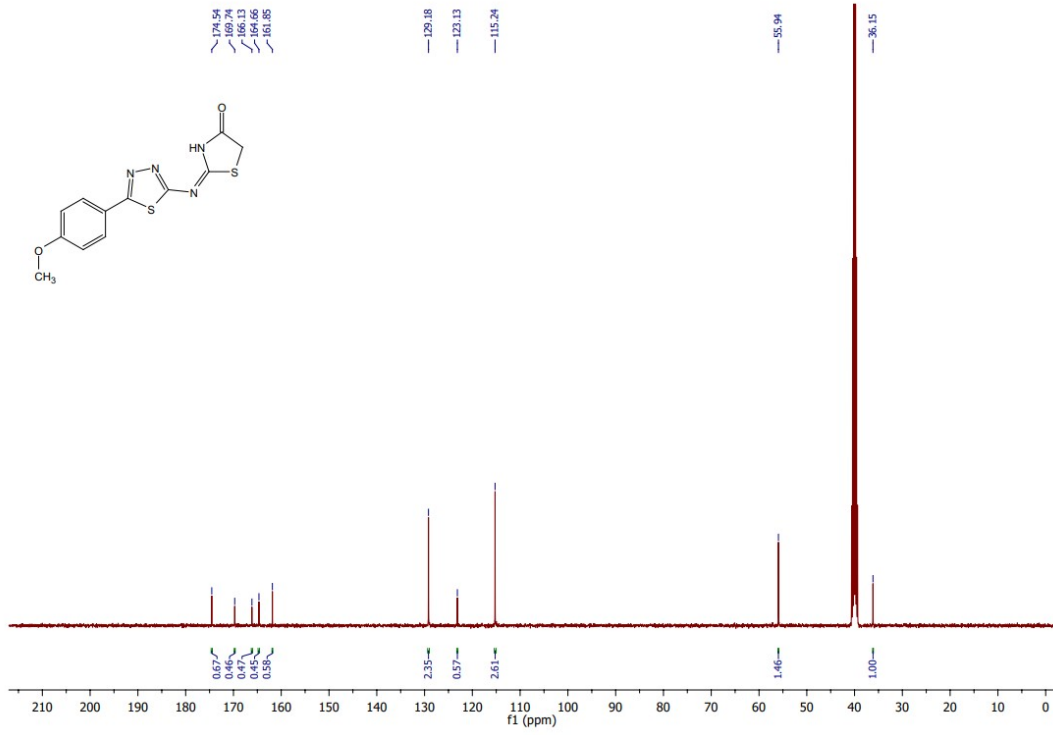

Fig. S18, ES†

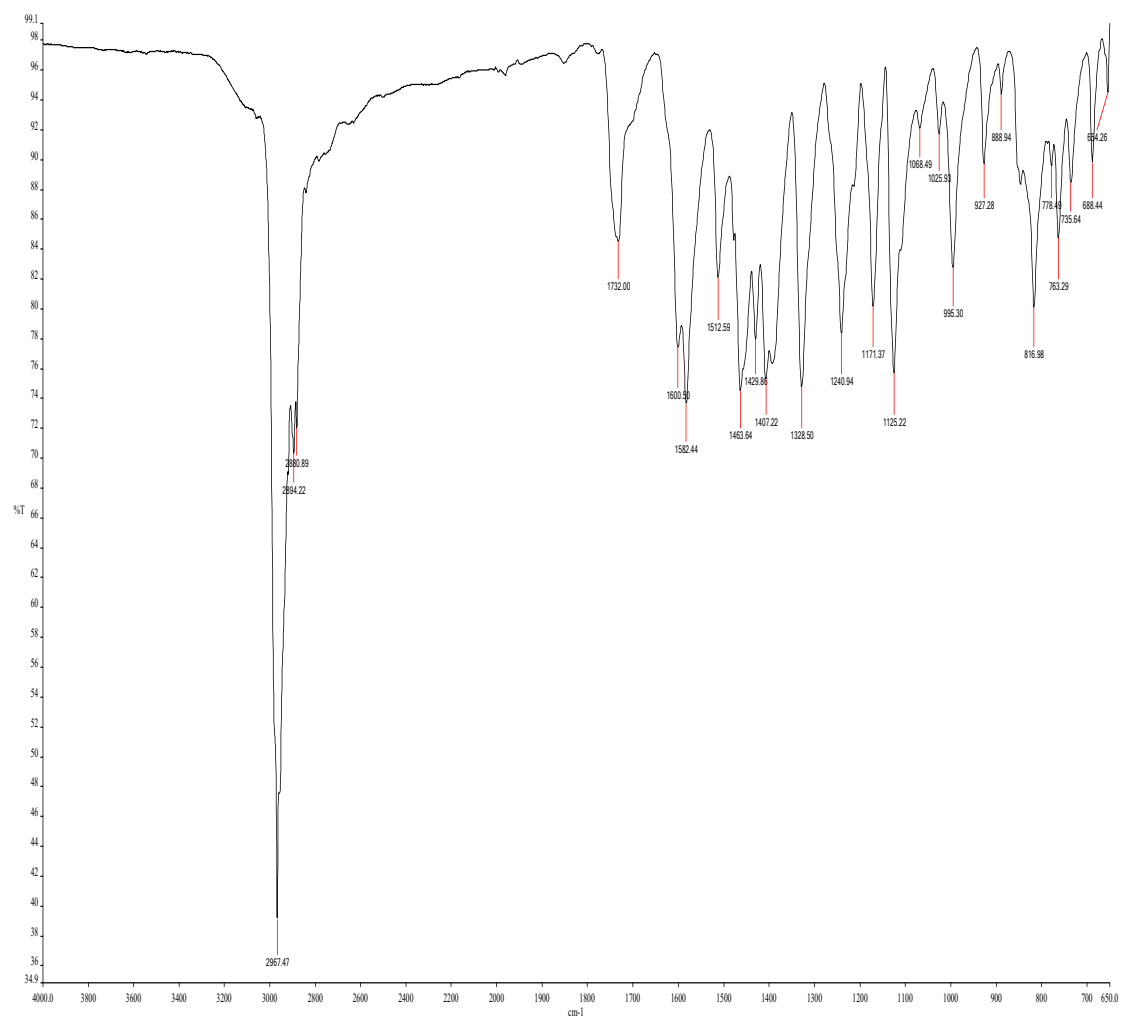

Fig. S19, ES†



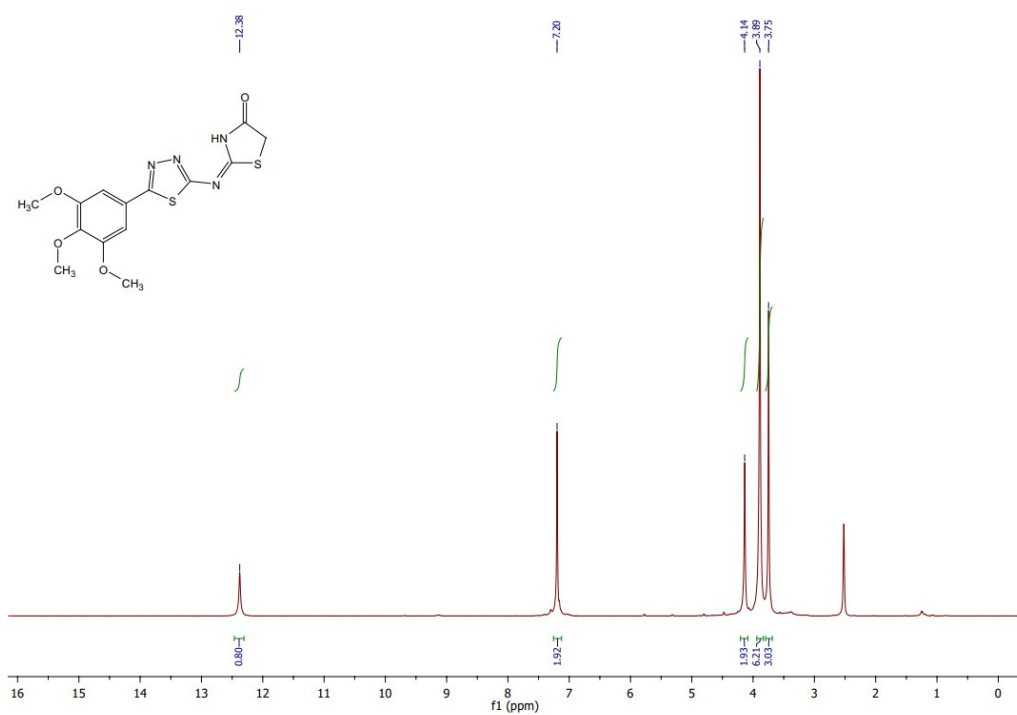

Fig. S20, ES†

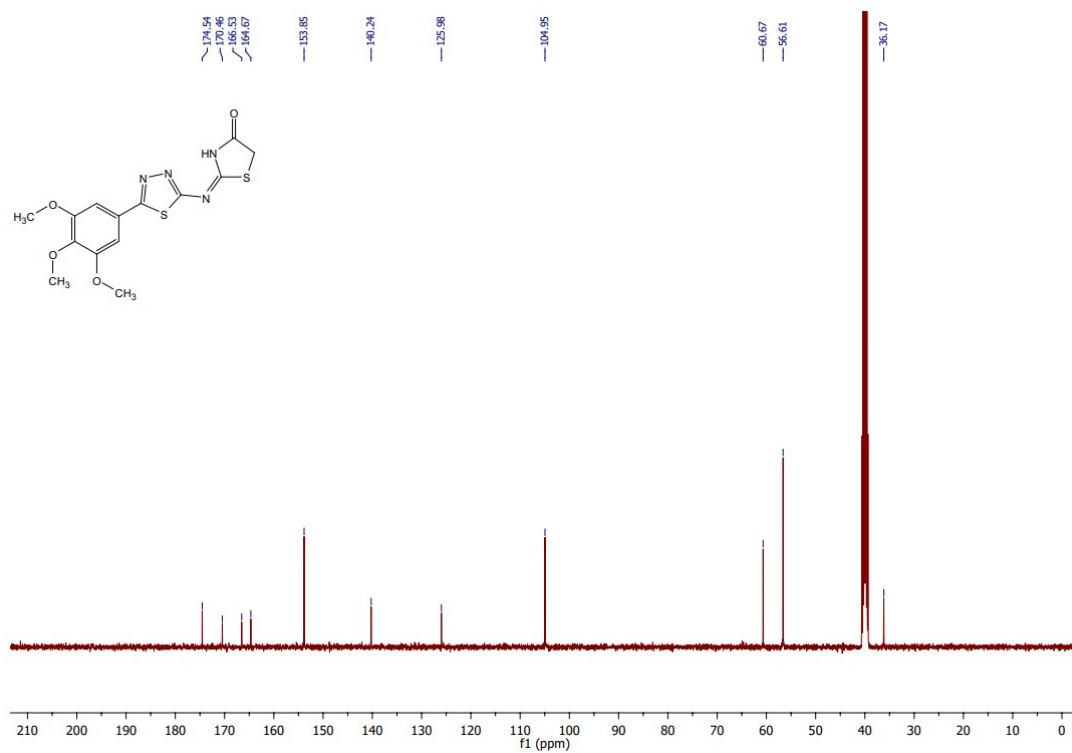

Fig. S21, ES†

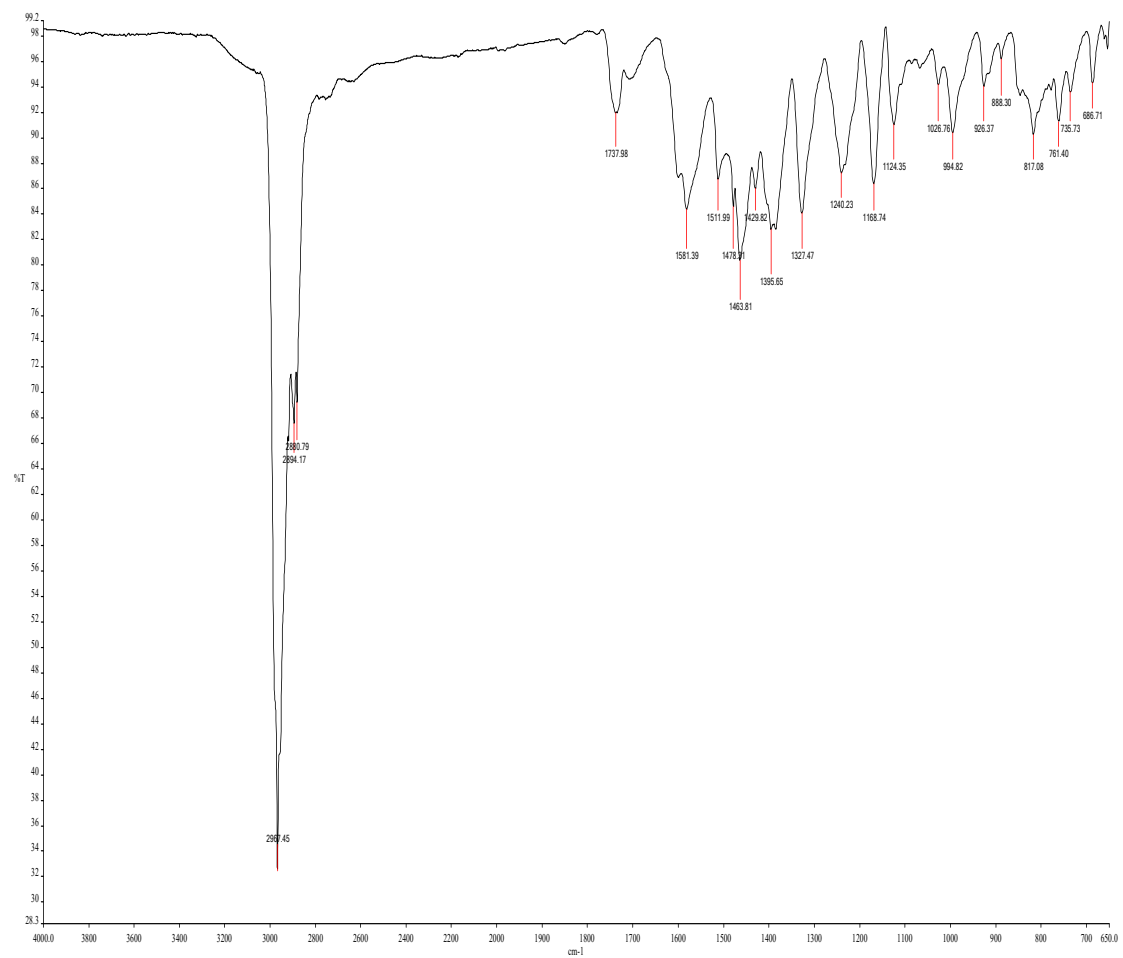

Fig. S22, ES†

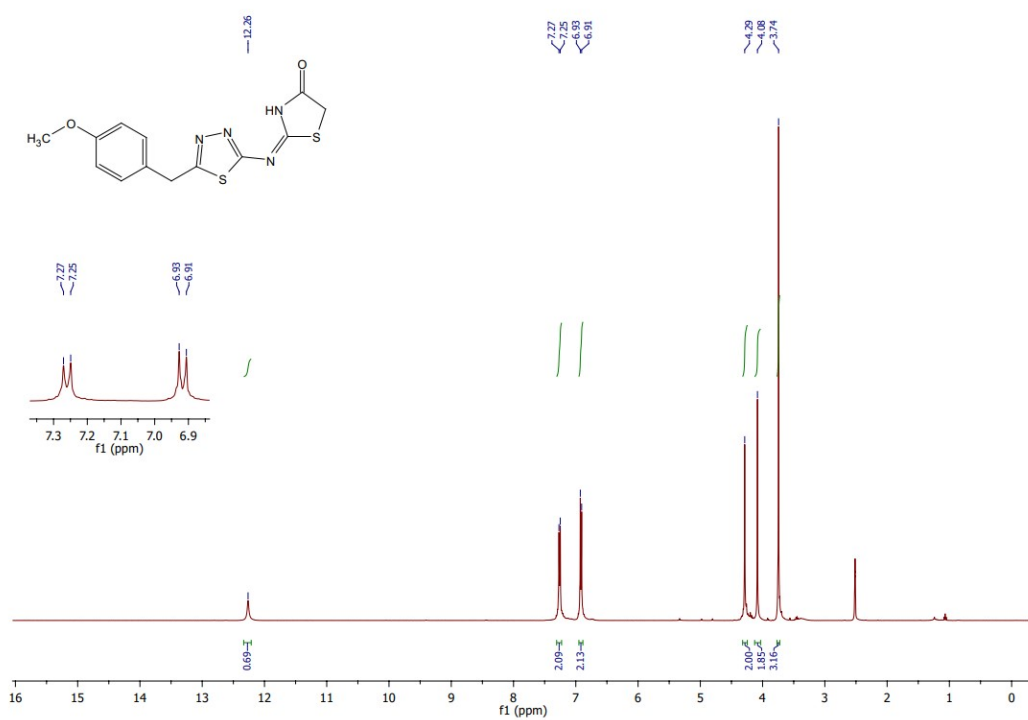

Fig. S23, ES†

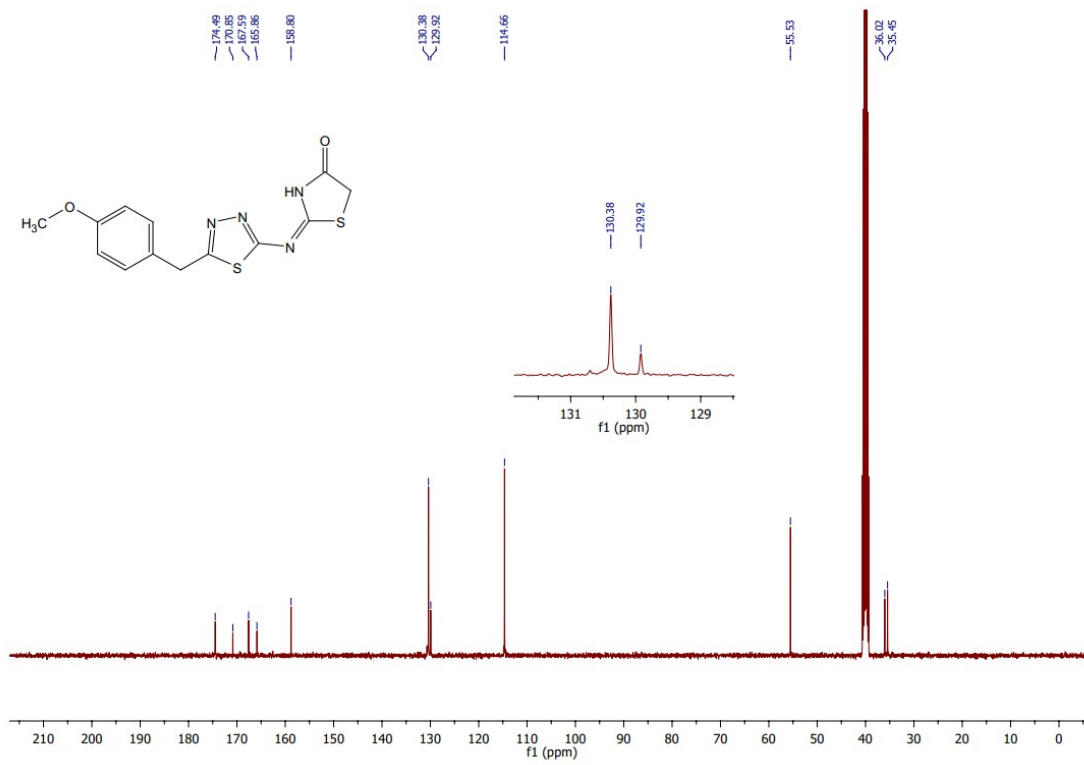

Fig. S24, ES†

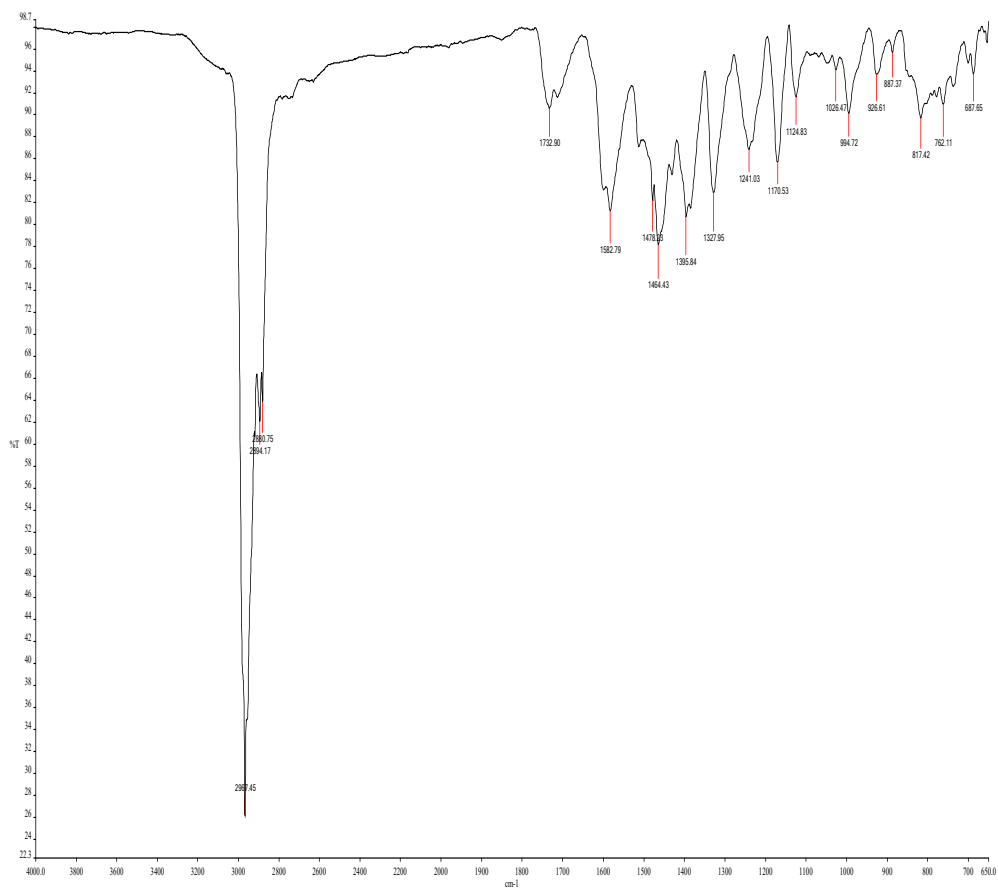

Fig. S25, ES†

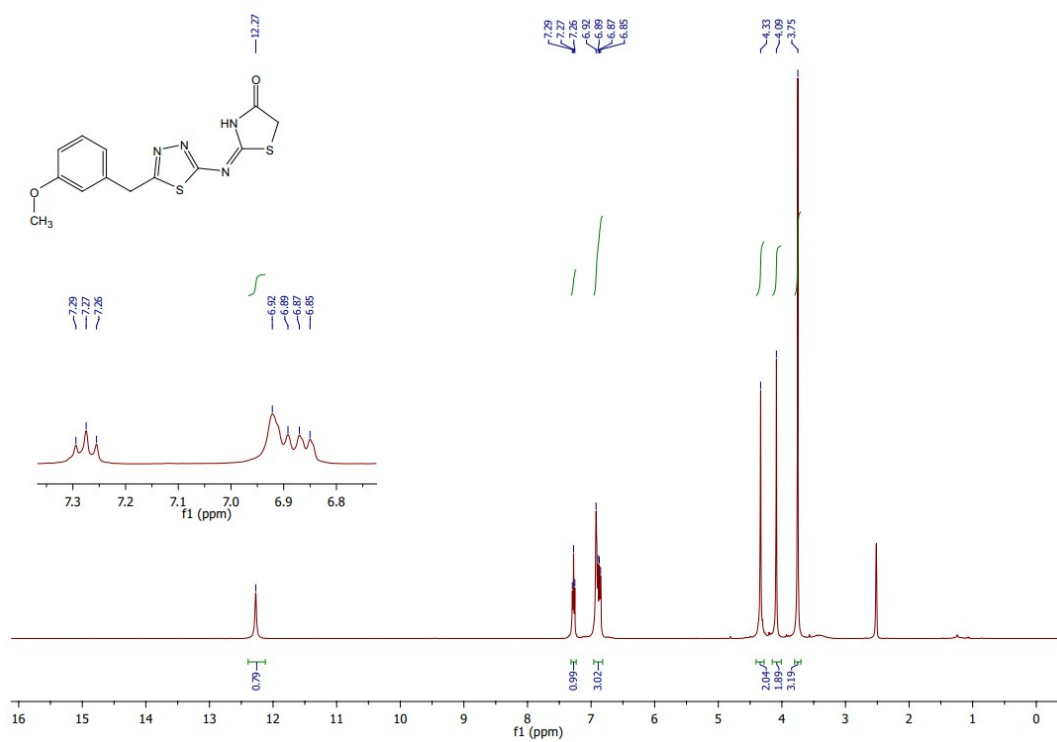

Fig. S26, ES†

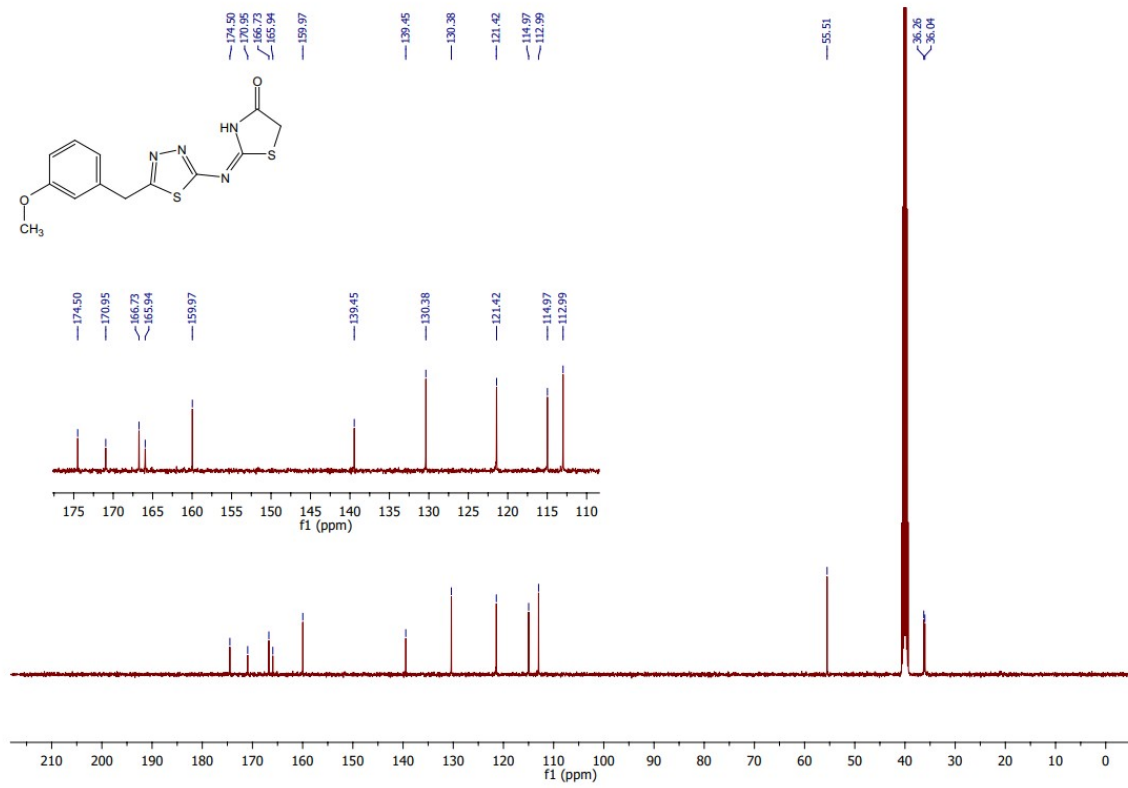

Fig. S27, ES†

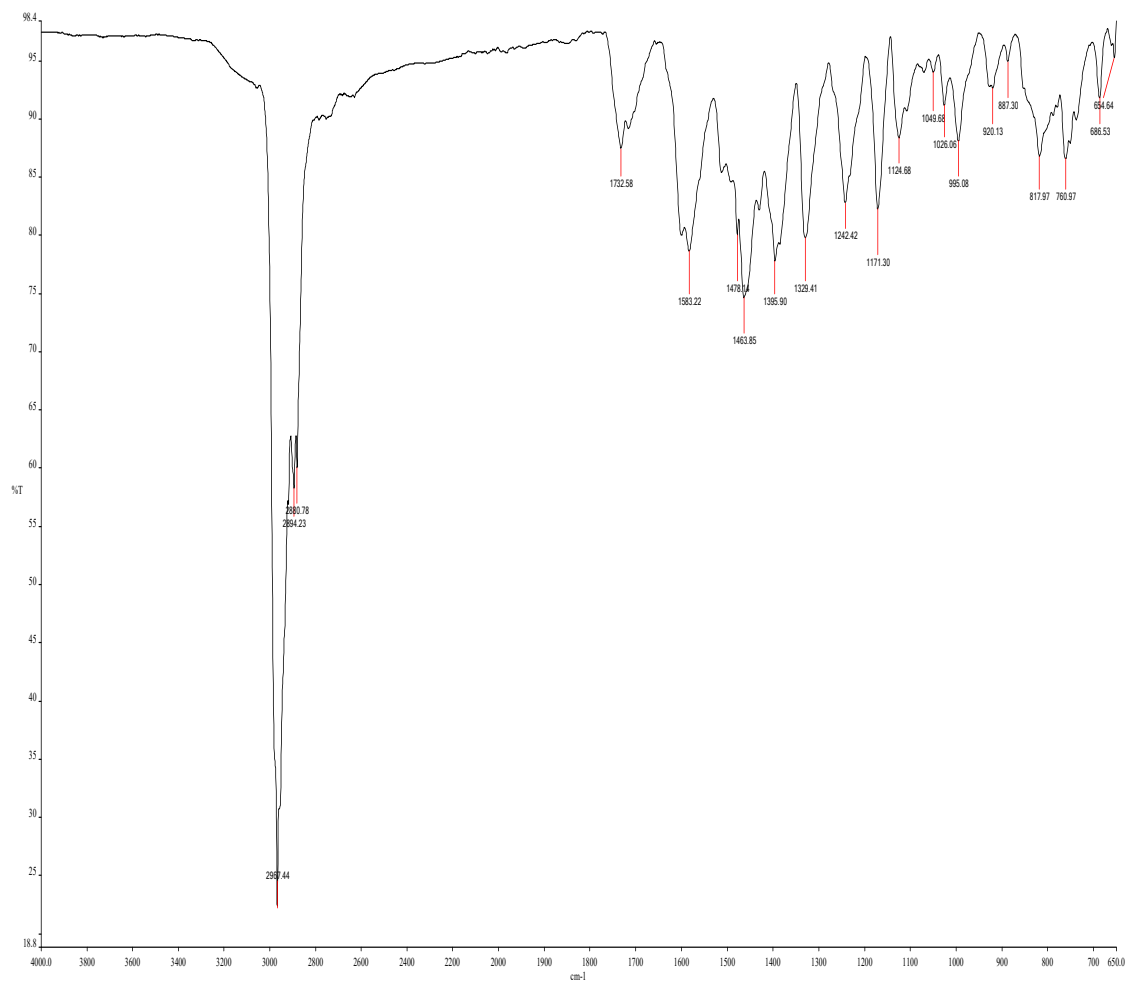

Fig. S28, ES<sup>‡</sup>

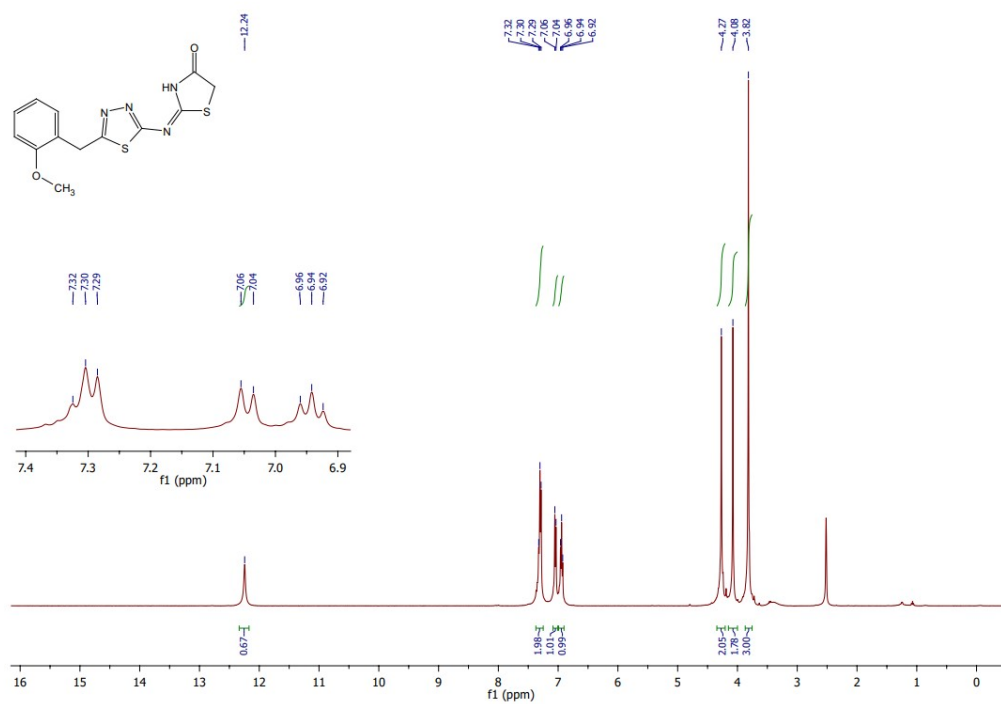

Fig. S29, ES<sup>+</sup>

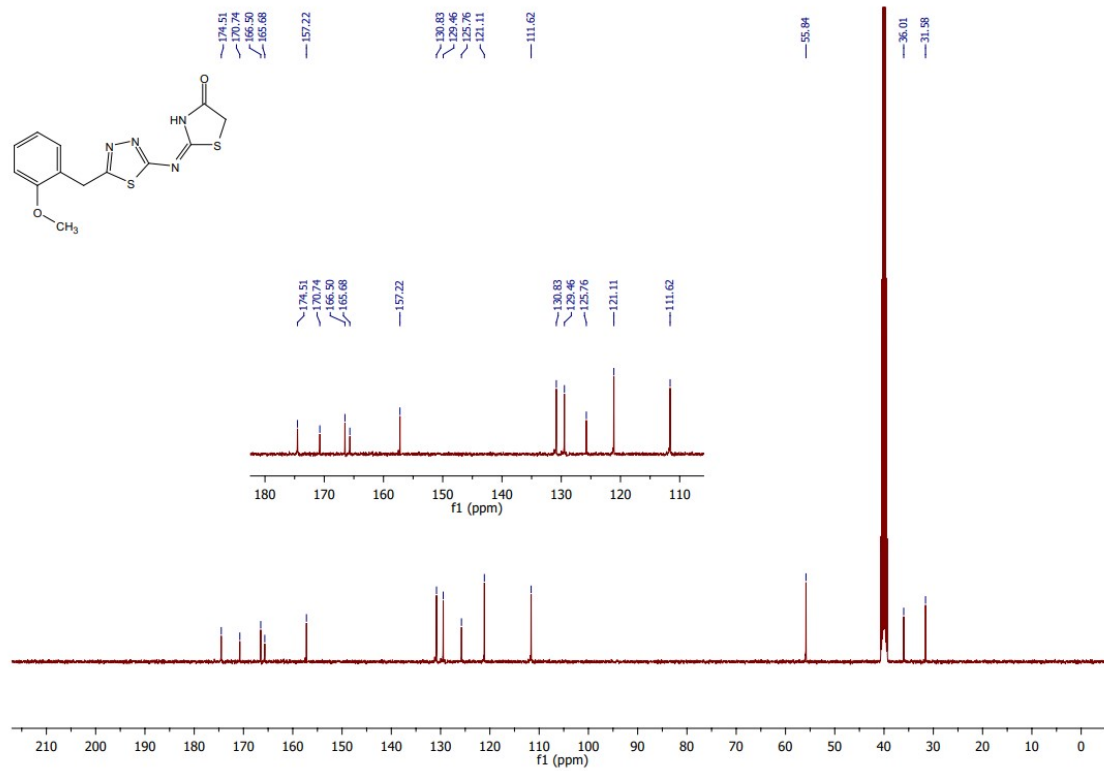

Fig. S30, ES<sup>+</sup>

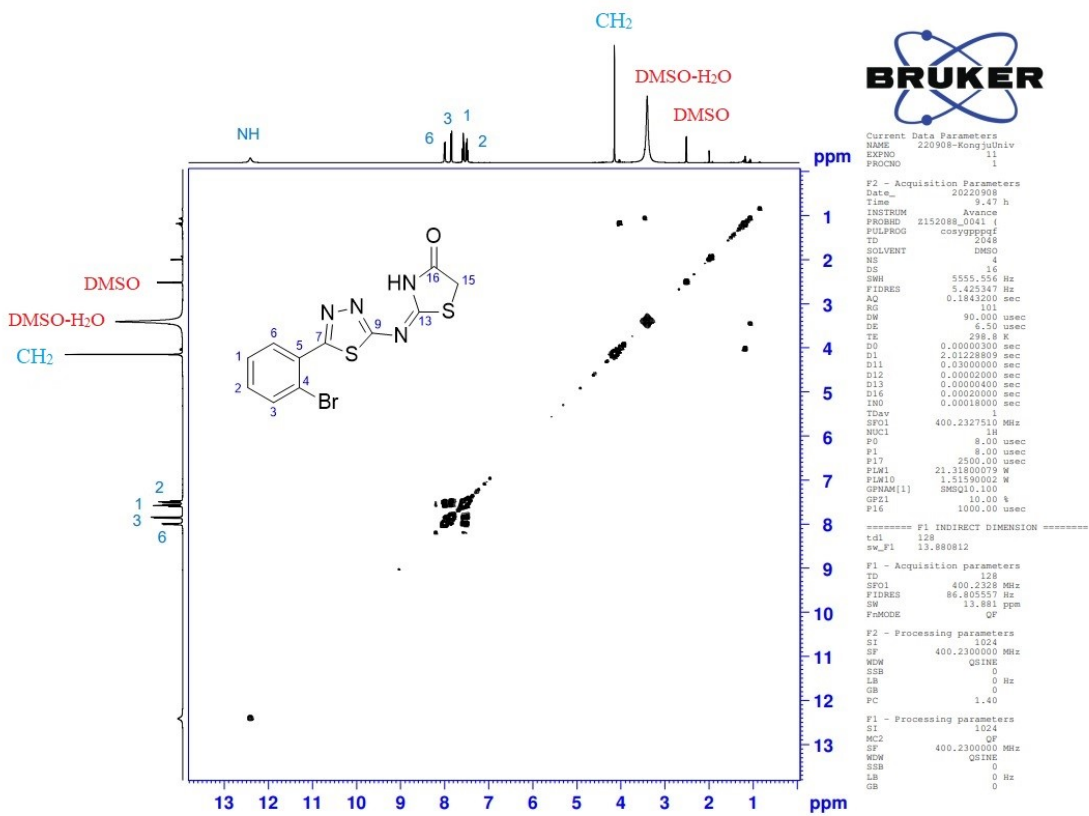

Fig. S31, ES†



HSQC

CH<sub>2</sub>-15

DMSO-H<sub>2</sub>O  
DMSO

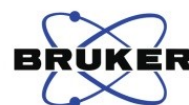

Current Data Parameters  
NAME 220908-KongjuUniv  
EXPNO 1  
PROCNO 1

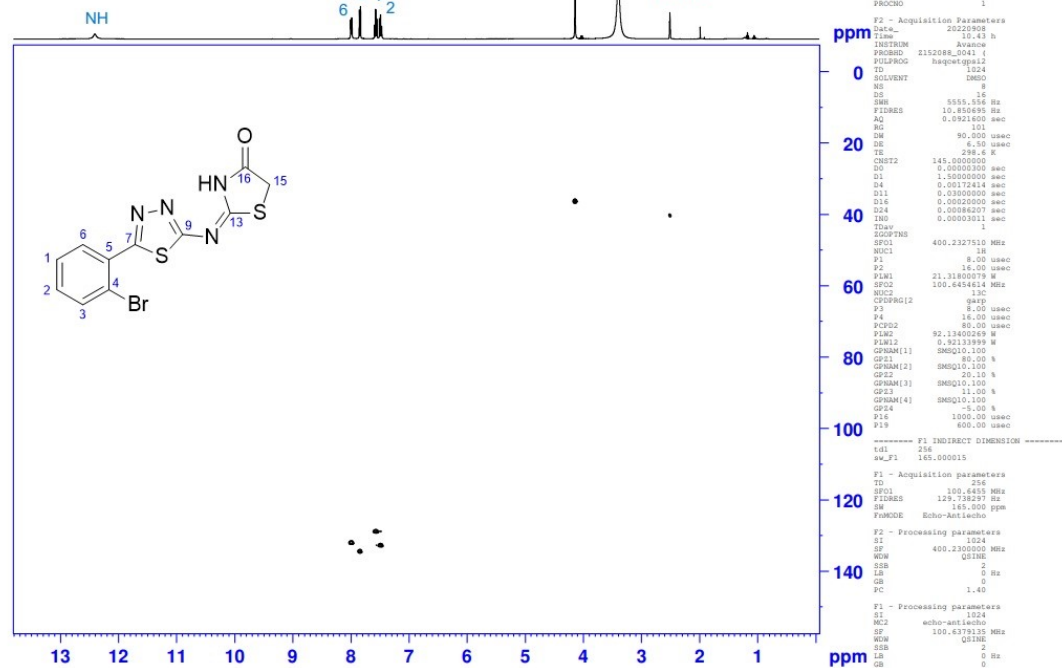

Fig. S32, ES†

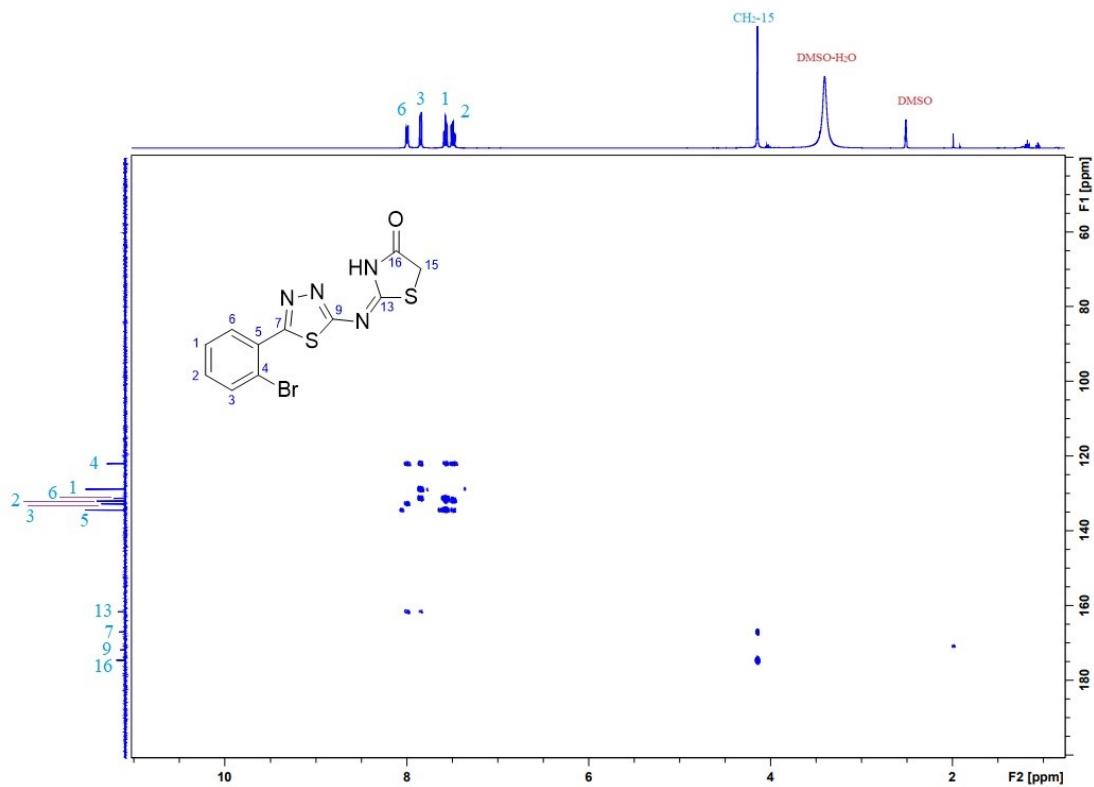

**Fig. S33, ES‡**

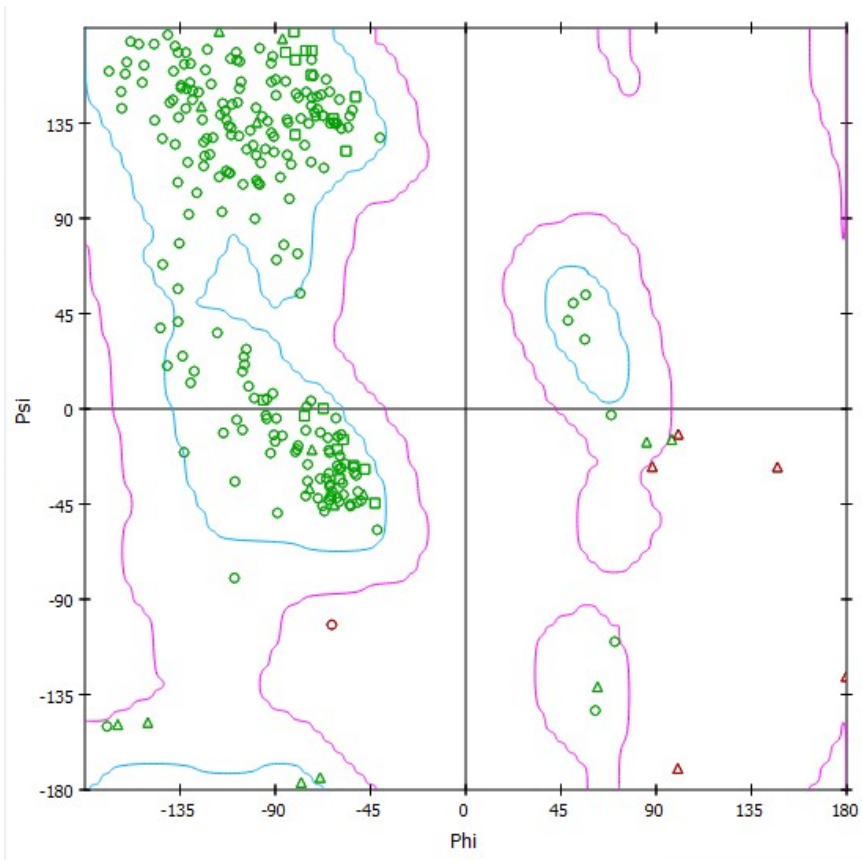

**Fig. S34, ES‡**

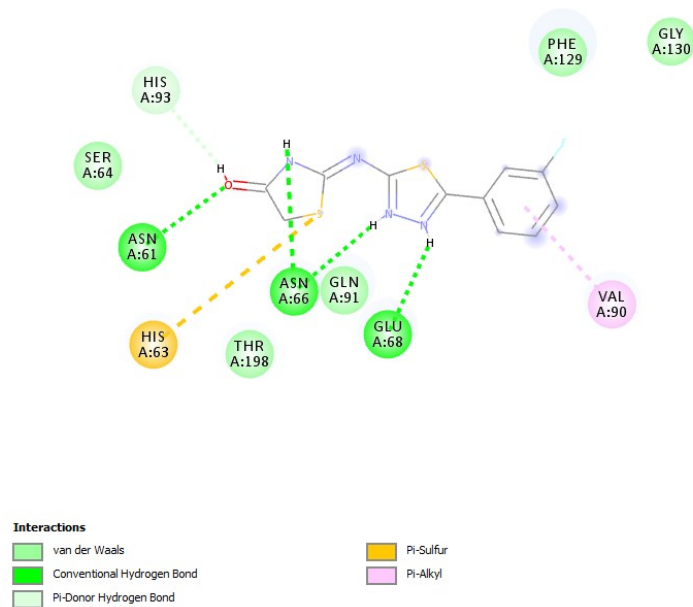

Fig. S35, ES‡

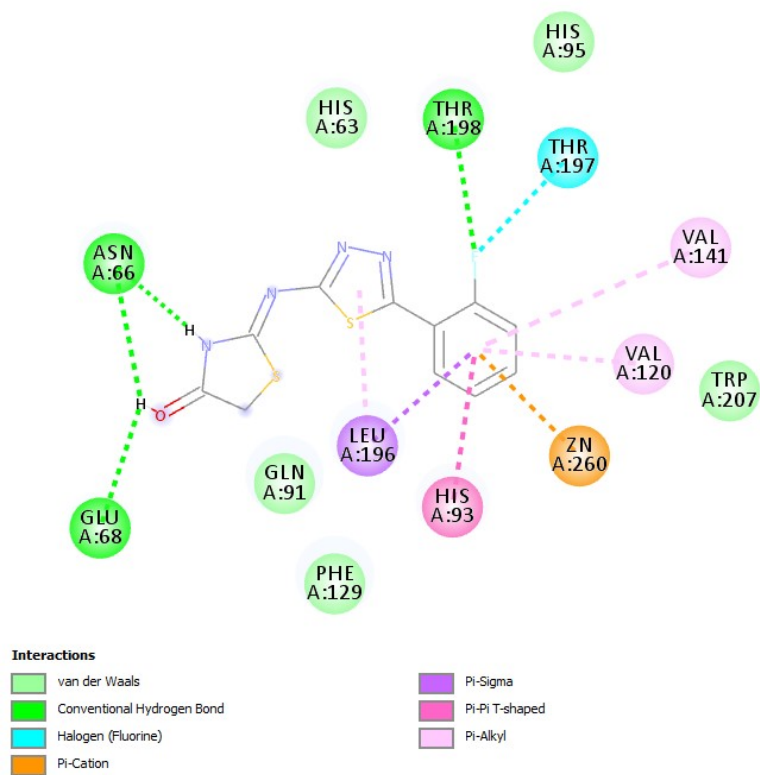

Fig. S36, ES‡

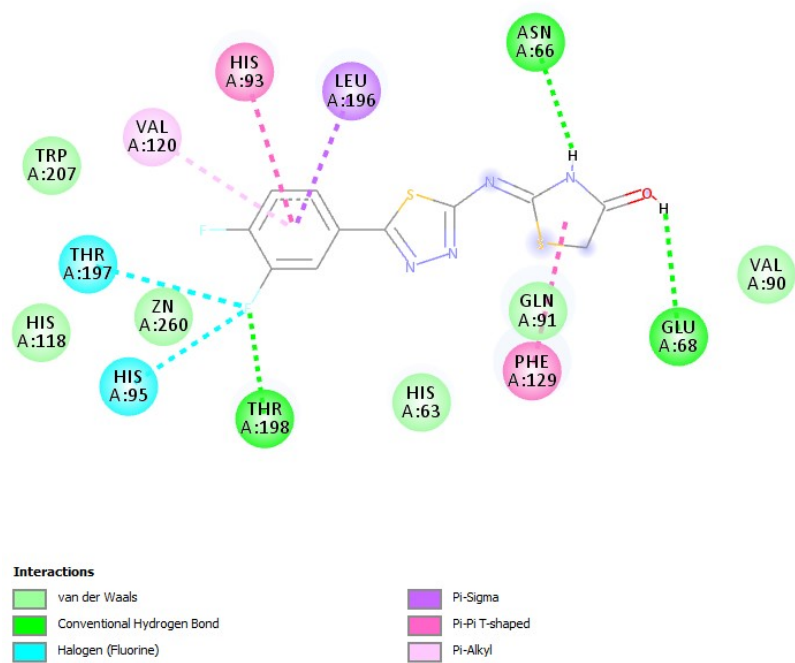

**Fig. S37, ES‡**

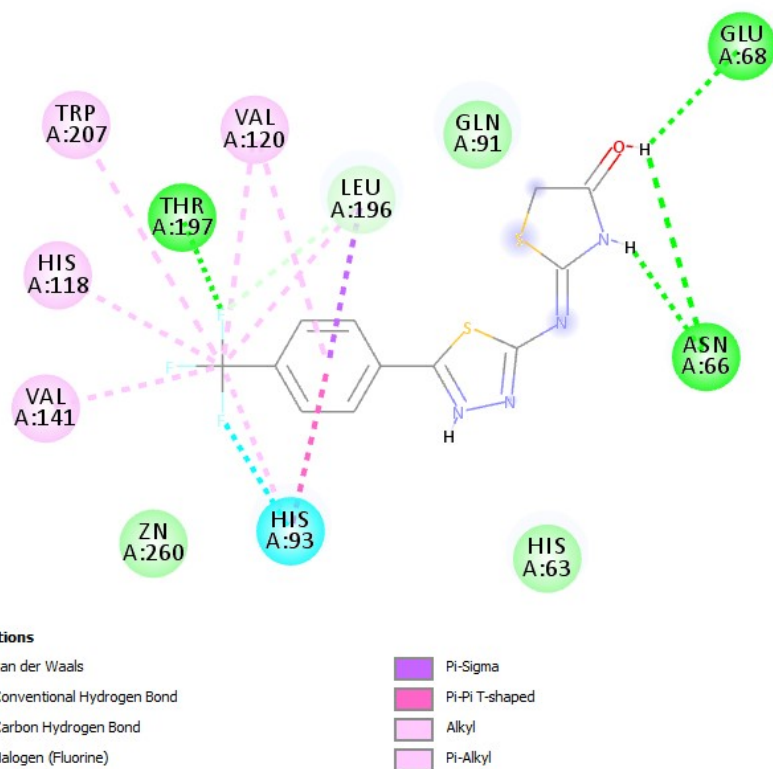

Fig. S38, ES‡

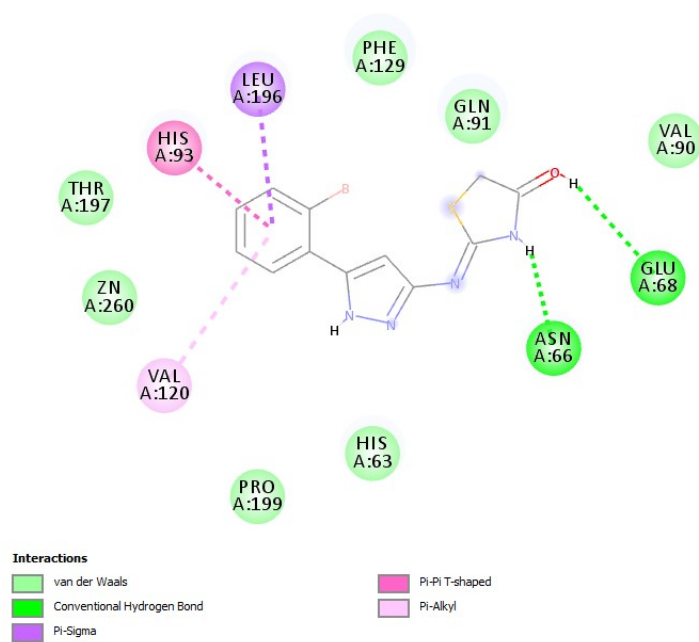

Fig. S39, ES‡

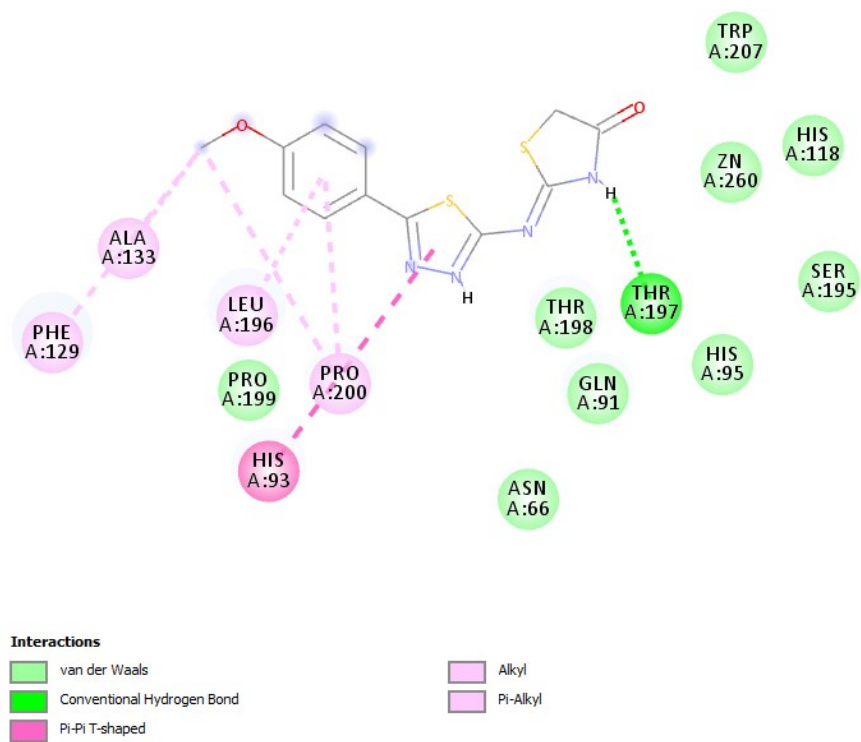

Fig. S40, ES‡

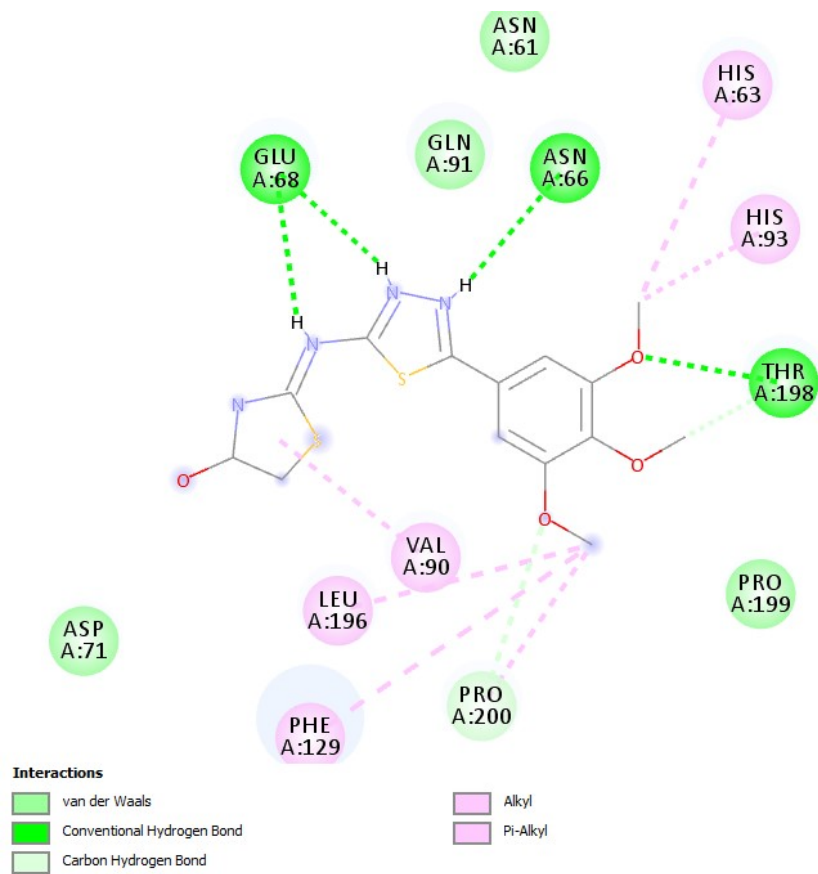

**Fig. S41, ES‡**

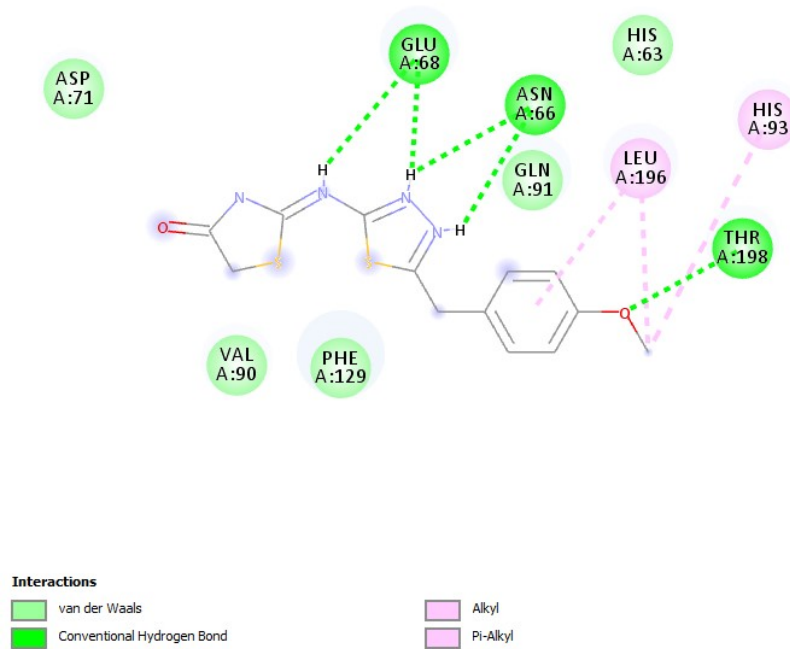

**Fig. S42, ES‡**



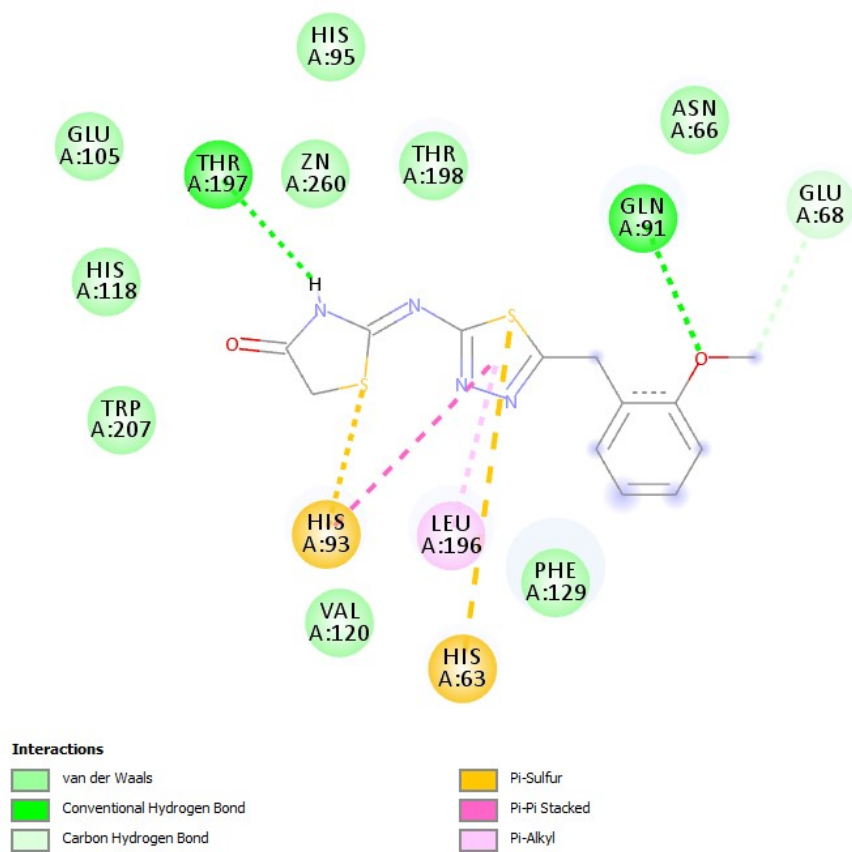

**Fig. S43, ES‡**
